# Supplementary material for: Identification of the AKCDPK gene family and AkCDPK15 functional analysis under drought and salt stress
Source: PLoS One. 2025 Jun 11;20(6):e0325453. doi: 10.1371/journal.pone.0325453 (PMC12157117; doi:10.1371/journal.pone.0325453)
Supplement: S1 Table — (XLSX) [file pone.0325453.s001.xlsx]

## Sheet: Sheet1
Table S1 CDPK amino acid sequences of Arabidopsis thaliana, Oryza sativa, and Amorphophallus konjac
Gene name	Gene ID	Species	Amino acid sequences
AtCPK1	At5g04870.1	Arabidopsis thaliana	MGNTCVGPSRNGFLQSVSAAMWRPRDGDDSASMSNGDIASEAVSGELRSRLSDEVQNKPPEQVTMPKPGTDVETKDREIRTESKPETLEEISLESKPETKQETKSETKPESKPDPPAKPKKPKHMKRVSSAGLRTESVLQRKTENFKEFYSLGRKLGQGQFGTTFLCVEKTTGKEFACKSIAKRKLLTDEDVEDVRREIQIMHHLAGHPNVISIKGAYEDVVAVHLVMECCAGGELFDRIIQRGHYTERKAAELTRTIVGVVEACHSLGVMHRDLKPENFLFVSKHEDSLLKTIDFGLSMFFKPDDVFTDVVGSPYYVAPEVLRKRYGPEADVWSAGVIVYILLSGVPPFWAETEQGIFEQVLHGDLDFSSDPWPSISESAKDLVRKMLVRDPKKRLTA…
AtCPK2	At3g10660.1	Arabidopsis thaliana	MGNACVGPNISGNGFLQTVTAAMWRPRIGAEQASSSSHGNGQVSKEAASEPATDQVQNKPPEPITMPSSKTNPETKLKPDLEIQPEEKKEKVLAEETKQKVVPEESKQEVPPEESKREVVVQPESAKPETKSESKPETTKPETTSETKPETKAEPQKPKHMRRVSSAGLRTESVLQRKTENFKEFYSLGRKLGQGQFGTTFLCLEKGTGNEYACKSISKRKLLTDEDVEDVRREIQIMHHLAGHPNVISIKGAYEDVVAVHLVMELCSGGELFDRIIQRGHYTERKAAELARTIVGVLEACHSLGVMHRDLKPENFLFVSREEDSLLKTIDFGLSMFFKPDEVFTDVVGSPYYVAPEVLRKRYGPESDVWSAGVIVYILLSGVPPFWAETEQGIFEQVL…
AtCPK3	At4g23650.1	Arabidopsis thaliana	MGHRHSKSKSSDPPPSSSSSSSGNVVHHVKPAGERRGSSGSGTVGSSGSGTGGSRSTTSTQQNGRILGRPMEEVRRTYEFGRELGRGQFGVTYLVTHKETKQQVACKSIPTRRLVHKDDIEDVRREVQIMHHLSGHRNIVDLKGAYEDRHSVNLIMELCEGGELFDRIISKGLYSERAAADLCRQMVMVVHSCHSMGVMHRDLKPENFLFLSKDENSPLKATDFGLSVFFKPGDKFKDLVGSAYYVAPEVLKRNYGPEADIWSAGVILYILLSGVPPFWGENETGIFDAILQGQLDFSADPWPALSDGAKDLVRKMLKYDPKDRLTAAEVLNHPWIREDGEASDKPLDNAVLSRMKQFRAMNKLKKMALKVIAENLSEEEIIGLKEMFKSLDTDNNGIV…
AtCPK4	At4g09570.1	Arabidopsis thaliana	MEKPNPRRPSNSVLPYETPRLRDHYLLGKKLGQGQFGTTYLCTEKSSSANYACKSIPKRKLVCREDYEDVWREIQIMHHLSEHPNVVRIKGTYEDSVFVHIVMEVCEGGELFDRIVSKGCFSEREAAKLIKTILGVVEACHSLGVMHRDLKPENFLFDSPSDDAKLKATDFGLSVFYKPGQYLYDVVGSPYYVAPEVLKKCYGPEIDVWSAGVILYILLSGVPPFWAETESGIFRQILQGKIDFKSDPWPTISEGAKDLIYKMLDRSPKKRISAHEALCHPWIVDEHAAPDKPLDPAVLSRLKQFSQMNKIKKMALRVIAERLSEEEIGGLKELFKMIDTDNSGTITFEELKAGLKRVGSELMESEIKSLMDAADIDNSGTIDYGEFLAATLHINKMER…
AtCPK5	At4g35310.1	Arabidopsis thaliana	MGNSCRGSFKDKLDEGDNNKPEDYSKTSTTNLSSNSDHSPNAADIIAQEFSKDNNSNNNSKDPALVIPLREPIMRRNPDNQAYYVLGHKTPNIRDIYTLSRKLGQGQFGTTYLCTEIASGVDYACKSISKRKLISKEDVEDVRREIQIMHHLAGHGSIVTIKGAYEDSLYVHIVMELCAGGELFDRIIQRGHYSERKAAELTKIIVGVVEACHSLGVMHRDLKPENFLLVNKDDDFSLKAIDFGLSVFFKPGQIFTDVVGSPYYVAPEVLLKRYGPEADVWTAGVILYILLSGVPPFWAETQQGIFDAVLKGYIDFESDPWPVISDSAKDLIRRMLSSKPAERLTAHEVLRHPWICENGVAPDRALDPAVLSRLKQFSAMNKLKKMALKVIAESLSEEE…
AtCPK6	At2g17290.1	Arabidopsis thaliana	MGNSCRGSFKDKIYEGNHSRPEENSKSTTTTVSSVHSPTTDQDFSKQNTNPALVIPVKEPIMRRNVDNQSYYVLGHKTPNIRDLYTLSRKLGQGQFGTTYLCTDIATGVDYACKSISKRKLISKEDVEDVRREIQIMHHLAGHKNIVTIKGAYEDPLYVHIVMELCAGGELFDRIIHRGHYSERKAAELTKIIVGVVEACHSLGVMHRDLKPENFLLVNKDDDFSLKAIDFGLSVFFKPGQIFKDVVGSPYYVAPEVLLKHYGPEADVWTAGVILYILLSGVPPFWAETQQGIFDAVLKGYIDFDTDPWPVISDSAKDLIRKMLCSSPSERLTAHEVLRHPWICENGVAPDRALDPAVLSRLKQFSAMNKLKKMALKVIAESLSEEEIAGLRAMFEAMD…
AtCPK7	At5g12480.1	Arabidopsis thaliana	MGNCCGNPSSATNQSKQGKPKNKNNPFYSNEYATTDRSGAGFKLSVLKDPTGHDISLQYDLGREVGRGEFGITYLCTDKETGEKYACKSISKKKLRTAVDIEDVRREVEIMKHMPKHPNVVSLKDSFEDDDAVHIVMELCEGGELFDRIVARGHYTERAAAAVMKTIVEVVQICHKQGVMHRDLKPENFLFANKKETSALKAIDFGLSVFFKPGEQFNEIVGSPYYMAPEVLRRNYGPEIDVWSAGVILYILLCGVPPFWAETEQGVAQAIIRSVIDFKRDPWPRVSDSAKDLVRKMLEPDPKKRLTAAQVLEHTWILNAKKAPNVSLGETVKARLKQFSVMNKLKKRALRVIAEHLSVEEAAGIKEAFEMMDVNKRGKINLEELKYGLQKAGQQIADT…
AtCPK8	At5g19450.1	Arabidopsis thaliana	MGNCCASPGSETGSKKGKPKIKSNPFYSEAYTTNGSGTGFKLSVLKDPTGHDISLMYDLGREVGRGEFGITYLCTDIKTGEKYACKSISKKKLRTAVDIEDVRREVEIMKHMPRHPNIVSLKDAFEDDDAVHIVMELCEGGELFDRIVARGHYTERAAAAVMKTILEVVQICHKHGVMHRDLKPENFLFANKKETSALKAIDFGLSVFFKPGEGFNEIVGSPYYMAPEVLRRNYGPEVDIWSAGVILYILLCGVPPFWAETEQGVAQAIIRSVIDFKRDPWPRVSETAKDLVRKMLEPDPKKRLSAAQVLEHSWIQNAKKAPNVSLGETVKARLKQFSVMNKLKKRALRVIAEHLSVEEVAGIKEAFEMMDSKKTGKINLEELKFGLHKLGQQQIPDTD…
AtCPK9	At3g20410.1	Arabidopsis thaliana	MGNCFAKNHGLMKPQQNGNTTRSVEVGVTNQDPPSYTPQARTTQQPEKPGSVNSQPPPWRAAAAAPGLSPKTTTKSNSILENAFEDVKLFYTLGKELGRGQFGVTYLCTENSTGKKYACKSISKKKLVTKADKDDMRREIQIMQHLSGQPNIVEFKGAYEDEKAVNLVMELCAGGELFDRIIAKGHYTERAAASVCRQIVNVVKICHFMGVLHRDLKPENFLLSSKDEKALIKATDFGLSVFIEEGKVYRDIVGSAYYVAPEVLRRRYGKEVDIWSAGIILYILLSGVPPFWAETEKGIFDAILEGHIDFESQPWPSISSSAKDLVRRMLTADPKRRISAADVLQHPWLREGGEASDKPIDSAVLSRMKQFRAMNKLKKLALKVIAENIDTEEIQGLKA…
AtCPK10	At1g18890.1	Arabidopsis thaliana	MGNCNACVRPDSKESKPSSKPKKPNRDRKLNPFAGDFTRSPAPIRVLKDVIPMSNQTQISDKYILGRELGRGEFGITYLCTDRETHEALACKSISKRKLRTAVDIEDVRREVAIMSTLPEHPNVVKLKASYEDNENVHLVMELCEGGELFDRIVARGHYTERAAAAVARTIAEVVMMCHSNGVMHRDLKPENFLFANKKENSPLKAIDFGLSVFFKPGDKFTEIVGSPYYMAPEVLKRDYGPGVDVWSAGVIIYILLCGVPPFWAETEQGVALAILRGVLDFKRDPWPQISESAKSLVKQMLDPDPTKRLTAQQVLAHPWIQNAKKAPNVPLGDIVRSRLKQFSMMNRFKKKVLRVIAEHLSIQEVEVIKNMFSLMDDDKDGKITYPELKAGLQKVGSQ…
AtCPK11	At1g35670.1	Arabidopsis thaliana	METKPNPRRPSNTVLPYQTPRLRDHYLLGKKLGQGQFGTTYLCTEKSTSANYACKSIPKRKLVCREDYEDVWREIQIMHHLSEHPNVVRIKGTYEDSVFVHIVMEVCEGGELFDRIVSKGHFSEREAVKLIKTILGVVEACHSLGVMHRDLKPENFLFDSPKDDAKLKATDFGLSVFYKPGQYLYDVVGSPYYVAPEVLKKCYGPEIDVWSAGVILYILLSGVPPFWAETESGIFRQILQGKLDFKSDPWPTISEAAKDLIYKMLERSPKKRISAHEALCHPWIVDEQAAPDKPLDPAVLSRLKQFSQMNKIKKMALRVIAERLSEEEIGGLKELFKMIDTDNSGTITFEELKAGLKRVGSELMESEIKSLMDAADIDNSGTIDYGEFLAATLHMNKME…
AtCPK12	At5g23580.1	Arabidopsis thaliana	MANKPRTRWVLPYKTKNVEDNYFLGQVLGQGQFGTTFLCTHKQTGQKLACKSIPKRKLLCQEDYDDVLREIQIMHHLSEYPNVVRIESAYEDTKNVHLVMELCEGGELFDRIVKRGHYSEREAAKLIKTIVGVVEACHSLGVVHRDLKPENFLFSSSDEDASLKSTDFGLSVFCTPGEAFSELVGSAYYVAPEVLHKHYGPECDVWSAGVILYILLCGFPPFWAESEIGIFRKILQGKLEFEINPWPSISESAKDLIKKMLESNPKKRLTAHQVLCHPWIVDDKVAPDKPLDCAVVSRLKKFSAMNKLKKMALRVIAERLSEEEIGGLKELFKMIDTDKSGTITFEELKDSMRRVGSELMESEIQELLRAADVDESGTIDYGEFLAATIHLNKLEREEN…
AtCPK13	At3g51850.1	Arabidopsis thaliana	MGNCCRSPAAVAREDVKSNYSGHDHARKDAAGGKKSAPIRVLSDVPKENIEDRYLLDRELGRGEFGVTYLCIERSSRDLLACKSISKRKLRTAVDIEDVKREVAIMKHLPKSSSIVTLKEACEDDNAVHLVMELCEGGELFDRIVARGHYTERAAAGVTKTIVEVVQLCHKHGVIHRDLKPENFLFANKKENSPLKAIDFGLSIFFKPGEKFSEIVGSPYYMAPEVLKRNYGPEIDIWSAGVILYILLCGVPPFWAESEQGVAQAILRGVIDFKREPWPNISETAKNLVRQMLEPDPKRRLTAKQVLEHPWIQNAKKAPNVPLGDVVESRLKQFSVMNRFKRKALRVIAEFLSTEEVEDIKVMFNKMDTDNDGIVSIEELKAGLRDFSTQLAESEVQML…
AtCPK14	At2g41860.1	Arabidopsis thaliana	MGNCCGTAGSLIQDKQKKGFKLPNPFSNEYGNHHDGLKLIVLKEPTGHEIKQKYKLGRELGRGEFGVTYLCTEIETGEIFACKSILKKKLKTSIDIEDVKREVEIMRQMPEHPNIVTLKETYEDDKAVHLVMELCEGGELFDRIVARGHYTERAAASVIKTIIEVVQMCHKHGVMHRDLKPENFLFANKKETASLKAIDFGLSVFFKPGERFNEIVGSPYYMAPEVLRRSYGQEIDIWSAGVILYILLCGVPPFWAETEHGVAKAILKSVIDFKRDPWPKVSDNAKDLIKKMLHPDPRRRLTAQQVLDHPWIQNGKNASNVSLGETVRARLKQFSVMNKLKKRALRVIAEHLSVEETSCIKERFQVMDTSNRGKITITELGIGLQKLGIVVPQDDIQIL…
AtCPK15	At4g21940.1	Arabidopsis thaliana	MGCFSSKHRNTESDIINGSVQSSIPTNQPENHVSRDVLKPQKPPSPQIPTTTQSNHHHQQESKPVNQQIEKKHVLTQPLKPIVFRETETILGKPFEEIRKLYTLGKELGRGQFGITYTCKENSTGNTYACKSILKRKLTRKQDIDDVKREIQIMQYLSGQENIVEIKGAYEDRQSIHLVMELCGGSELFDRIIAQGHYSEKAAAGVIRSVLNVVQICHFMGVIHRDLKPENFLLASTDENAMLKATDFGLSVFIEEGKVYRDIVGSAYYVAPEVLRRSYGKEIDIWSAGIILYILLCGVPPFWSETEKGIFNEIIKGEIDFDSQPWPSISESAKDLVRKLLTKDPKQRISAAQALEHPWIRGGEAPDKPIDSAVLSRMKQFRAMNKLKKLALKVIAESL…
AtCPK16	At2g17890.1	Arabidopsis thaliana	MGLCFSSAAKSSGHNRSSRNPHPHPPLTVVKSRPPRSPCSFMAVTIQKDHRTQPRRNATAKKTPTRHTPPHGKVREKVISNNGRRHGETIPYGKRVDFGYAKDFDHRYTIGKLLGHGQFGYTYVATDKKTGDRVAVKKIDKAKMTIPIAVEDVKREVKILQALTGHENVVRFYNAFEDKNSVYIVMELCEGGELLDRILARKDSRYSERDAAVVVRQMLKVAAECHLRGLVHRDMKPENFLFKSTEEDSPLKATDFGLSDFIKPGKKFHDIVGSAYYVAPEVLKRRSGPESDVWSIGVISYILLCGRRPFWDKTEDGIFKEVLKNKPDFRRKPWPTISNSAKDFVKKLLVKDPRARLTAAQALSHPWVREGGDASEIPIDISVLNNMRQFVKFSRLKQF…
AtCPK17	At5g12180.1	Arabidopsis thaliana	MGNCCSHGRDSADNGDALENGASASNAANSTGPTAEASVPQSKHAPPSPPPATKQGPIGPVLGRPMEDVKASYSLGKELGRGQFGVTHLCTQKATGHQFACKTIAKRKLVNKEDIEDVRREVQIMHHLTGQPNIVELKGAYEDKHSVHLVMELCAGGELFDRIIAKGHYSERAAASLLRTIVQIVHTCHSMGVIHRDLKPENFLLLNKDENSPLKATDFGLSVFYKPGEVFKDIVGSAYYIAPEVLKRKYGPEADIWSIGVMLYILLCGVPPFWAESENGIFNAILRGHVDFSSDPWPSISPQAKDLVKKMLNSDPKQRLTAAQVLNHPWIKEDGEAPDVPLDNAVMSRLKQFKAMNNFKKVALRVIAGCLSEEEIMGLKEMFKGMDTDSSGTITLEEL…
AtCPK18	At4g36070.1	Arabidopsis thaliana	MGLCFSSPKATRRGTGSRNPNPDSPTQGKASEKVSNKNKKNTKKIQLRHQGGIPYGKRIDFGYAKDFDNRYTIGKLLGHGQFGFTYVATDNNNGNRVAVKRIDKAKMTQPIEVEDVKREVKILQALGGHENVVGFHNAFEDKTYIYIVMELCDGGELLDRILAKKDSRYTEKDAAVVVRQMLKVAAECHLRGLVHRDMKPENFLFKSTEEGSSLKATDFGLSDFIKPGVKFQDIVGSAYYVAPEVLKRRSGPESDVWSIGVITYILLCGRRPFWDKTQDGIFNEVMRKKPDFREVPWPTISNGAKDFVKKLLVKEPRARLTAAQALSHSWVKEGGEASEVPIDISVLNNMRQFVKFSRLKQIALRALAKTINEDELDDLRDQFDAIDIDKNGSISLEEM…
AtCPK19	At1g61950.1	Arabidopsis thaliana	MGCLCINLKKKVKKPTPDISGEQNTEVKSREITPKEQPRQRQPAPRAKFQIVVQPHKLPLPLPQPQEKQKLINHQKQSTLQQPEPILGRPFEDIKEKYSLGRELGRGQFGITYICTEISSGKNFACKSILKRKLIRTKDREDVRREIQIMHYLSGQPNIVEIKGAYEDRQSVHLVMELCEGGELFDKITKRGHYSEKAAAEIIRSVVKVVQICHFMGVIHRDLKPENFLLSSKDEASSMLKATDFGVSVFIEEGKVYEDIVGSAYYVAPEVLKRNYGKAIDIWSAGVILYILLCGNPPFWAETDKGIFEEILRGEIDFESEPWPSISESAKDLVRNMLKYDPKKRFTAAQVLEHPWIREGGEASDKPIDSAVLSRMKQLRAMNKLKKLAFKFIAQNLKE…
AtCPK20	At2g38910.1	Arabidopsis thaliana	MGNTCVGPNLNPNGFLQSVSAAVWRNQKPDDSIKSSKDESSRKKNDKSVNGDDSNGHVSSTVDPAPSTLPTPSTPPPPVKMANEEPPPKPITENKEDPNSKPQKKEAHMKRMASAGLQIDSVLGRKTENLKDIYSVGRKLGQGQFGTTFLCVDKKTGKEFACKTIAKRKLTTPEDVEDVRREIQIMHHLSGHPNVIQIVGAYEDAVAVHVVMEICAGGELFDRIIQRGHYTEKKAAELARIIVGVIEACHSLGVMHRDLKPENFLFVSGDEEAALKTIDFGLSVFFKPGETFTDVVGSPYYVAPEVLRKHYSHECDVWSAGVIIYILLSGVPPFWDETEQGIFEQVLKGDLDFISEPWPSVSESAKDLVRRMLIRDPKKRMTTHEVLCHPWARVDGVAL…
AtCPK21	At4g04720.1	Arabidopsis thaliana	MGCFSSKHRKTQNDGGEKSIPINPVQTHVVPEHRKPQTPTPKPMTQPIHQQISTPSSNPVSVRDPDTILGKPFEDIRKFYSLGKELGRGQFGITYMCKEIGTGNTYACKSILKRKLISKQDKEDVKREIQIMQYLSGQPNIVEIKGAYEDRQSIHLVMELCAGGELFDRIIAQGHYSERAAAGIIRSIVNVVQICHFMGVVHRDLKPENFLLSSKEENAMLKATDFGLSVFIEEGKVYRDIVGSAYYVAPEVLRRSYGKEIDIWSAGVILYILLSGVPPFWAENEKGIFDEVIKGEIDFVSEPWPSISESAKDLVRKMLTKDPKRRITAAQVLEHPWIKGGEAPDKPIDSAVLSRMKQFRAMNKLKKLALKVIAESLSEEEIKGLKTMFANIDTDKSGT…
AtCPK22	At4g04710.1	Arabidopsis thaliana	MGNCCGSKPLTASDIVSDQKQETILGKPLEDIKKHYSFGDELGKGKSYACKSIPKRTLSSEEEKEAVKTEIQIMDHVSGQPNIVQIKGSYEDNNSIHIVMELCGGGELFDKIDALVKSHSYYSEKDAAGIFRSIVNAVKICHSLDVVHRDLKPENFLFSSKDENAMLKAIDFGCSVYIKEGKTFERVVGSKYYIAPEVLEGSYGKEIDIWSAGVILYILLSGVPPFQTGIESIIVSTLCIVDAEIKECRLDFESQPWPLISFKAKHLIGKMLTKKPKERISAADVLEHPWMKSEAPDKPIDNVVLSRMKQFRAMNKLKKLALKVIAEGLSEEEIKGLKTMFENMDMDKSGSITYEELKMGLNRHGSKLSETEVKQLMEAVSADVDGNGTIDYIEFISAT…
AtCPK23	At4g04740.1	Arabidopsis thaliana	MGCFSSKHRKTQNDGGGERSIPIIPVQTHIVDQVPDHRKPQIPSPSIPISVRDPETILGKPFEDIRKFYSLGRELGRGGLGITYMCKEIGTGNIYACKSILKRKLISELGREDVKTEIQIMQHLSGQPNVVEIKGSYEDRHSVHLVMELCAGGELFDRIIAQGHYSERAAAGTIKSIVDVVQICHLNGVIHRDLKPENFLFSSKEENAMLKVTDFGLSAFIEEGKIYKDVVGSPYYVAPEVLRQSYGKEIDIWSAGVILYILLCGVPPFWADNEEGVFVEILKCKIDFVREPWPSISDSAKDLVEKMLTEDPKRRITAAQVLEHPWIKGGEAPEKPIDSTVLSRMKQFRAMNKLKKLALKVSAVSLSEEEIKGLKTLFANMDTNRSGTITYEQLQTGLS…
AtCPK24	At2g31500.1	Arabidopsis thaliana	MGSCVSSPLKGSPFGKRPVRRRHSSNSRTSSVPRFDSSTNLSRRLIFQPPSRVLPEPIGDGIHLKYDLGKELGRGEFGVTHECIEISTRERFACKRISKEKLRTEIDVEDVRREVEIMRCLPKHPNIVSFKEAFEDKDAVYLVMEICEGGELFDRIVSRGHYTERAAASVAKTILEVVKVCHEHGVIHRDLKPENFLFSNGTETAQLKAIDFGLSIFFKPAQRFNEIVGSPYYMAPEVLRRNYGPEIDVWSAGVILYILLCGVPPFWAETEEGIAHAIVRGNIDFERDPWPKVSHEAKELVKNMLDANPYSRLTVQEVLEHPWIRNAERAPNVNLGDNVRTKIQQFLLMNRFKKKVLRIVADNLPNEEIAAIVQMFQTMDTDKNGHLTFEELRDGLKKI…
AtCPK25	At2g35890.1	Arabidopsis thaliana	MGNVCVHMVNNCVDTKSNSWVRPTDLIMDHPLKPQLQDKPPQPMLMNKDDDKTKLNDTHGDPKLLEGKEKPAQKQTSQGQGGRKCSDEEYKKRAIACANSKRKAHNVRRLMSAGLQAESVLKTKTGHLKEYYNLGSKLGHGQFGTTFVCVEKGTGEEYACKSIPKRKLENEEDVEDVRREIEIMKHLLGQPNVISIKGAYEDSVAVHMVMELCRGGELFDRIVERGHYSERKAAHLAKVILGVVQTCHSLGVMHRDLKPENFLFVNDDEDSPLKAIDFGLSMFLKPGENFTDVVGSPYYIAPEVLNKNYGPEADIWSAGVMIYVLLSGSAPFWGETEEEIFNEVLEGELDLTSDPWPQVSESAKDLIRKMLERNPIQRLTAQQVLCHPWIRDEGNAPDT…
AtCPK26	At4g38230.1	Arabidopsis thaliana	MKHSGGNQACYVLGQKTPSIRDLYSLGHKLGQGQFGTTYMCKEISTGREYACKSITKRKLISKEDVEDVRREIQIMHHLAGYKNIVTIKGAYEDPLYVHIVMELCSGGELFDRIIQRGHYSERKAAELIKIIVGVVEACHSLGVMHRDLKPENFLLVNKDDDFSLKAIDFGLSVFFKPGQIFEDVVGSPYYVAPEVLLKHYGPEADVWTAGVILYILVSGVPPFWAETQQGIFDAVLKGHIDFDSDPWPLISDSAKNLIRGMLCSRPSERLTAHQVLRHPWICENGVAPDRALDPAVLSRLKQFSAMNKLKQMALRVIAESLSEEEIAGLKEMFKAMDTDNSGAITFDELKAGLRRYGSTLKDTEIRDLMEAADIDKSGTIDYGEFIAATIHLNKLERE…
AtCPK27	At4g04700.1	Arabidopsis thaliana	MGCFSSKELQQSKRTILEKPLVDITKIYILGEELGRGNFGLTRKCVEKSTGKTFACKTILKTKLKDEECEEDVKREIRIMKQLSGEPNIVEFKNAYEDKDSVHIVMEYCGGGELYDKILALYDVGKSYSEKEAAGIIRSIVNVVKNCHYMGVMHRDLKPENFLLTSNDDNATVKVIDFGCSVFIEEGKVYQDLAGSDYYIAPEVLQGNYGKEADIWSAGIILYILLCGKSPFVKEPEGQMFNEIKSLEIDYSEEPWPLRDSRAIHLVKRMLDRNPKERISAAEVLGHPWMKEGEASDKPIDGVVLSRLKRFRDANKFKKVVLKFIAANLSEEEIKGLKTLFTNIDTDKSGNITLEELKTGLTRLGSNLSKTEVEQLMEAADMDGNGTIDIDEFISATMH…
AtCPK28	At5g66210.1	Arabidopsis thaliana	MGVCFSAIRVTGASSSRRSSQTKSKAAPTPIDTKASTKRRTGSIPCGKRTDFGYSKDFHDHYTIGKLLGHGQFGYTYVAIHRPNGDRVAVKRLDKSKMVLPIAVEDVKREVQILIALSGHENVVQFHNAFEDDDYVYIVMELCEGGELLDRILSKKGNRYSEKDAAVVVRQMLKVAGECHLHGLVHRDMKPENFLFKSAQLDSPLKATDFGLSDFIKPGKRFHDIVGSAYYVAPEVLKRRSGPESDVWSIGVITYILLCGRRPFWDRTEDGIFKEVLRNKPDFSRKPWATISDSAKDFVKKLLVKDPRARLTAAQALSHAWVREGGNATDIPVDISVLNNLRQFVRYSRLKQFALRALASTLDEAEISDLRDQFDAIDVDKNGVISLEEMRQALAKDLP…
AtCPK29	At1g76040.1	Arabidopsis thaliana	MLQNQHKTTKNQRNKNIGTKYFLRKKIMGFCFSKFGKSQTHEIPISSSSDSSPPHHYQPLPKPTVSQGQTSNPTSNPQPKPKPAPPPPPSTSSGSQIGPILNRPMIDLSALYDLHKELGRGQFGITYKCTDKSNGREYACKSISKRKLIRRKDIEDVRREVMILQHLTGQPNIVEFRGAYEDKDNLHLVMELCSGGELFDRIIKKGSYSEKEAANIFRQIVNVVHVCHFMGVVHRDLKPENFLLVSNEEDSPIKATDFGLSVFIEEGKVYRDIVGSAYYVAPEVLHRNYGKEIDVWSAGVMLYILLSGVPPFWGETEKTIFEAILEGKLDLETSPWPTISESAKDLIRKMLIRDPKKRITAAEALEHPWMTDTKISDKPINSAVLVRMKQFRAMNKLKK…
AtCPK30	At1g74740.1	Arabidopsis thaliana	MGNCIACVKFDPDNSKPNQKKKPPRGRQRNPYDDPDGLRTHAPLRVIPMSHQSQISDKYILGRELGRGEFGITYLCTDRETREALACKSISKRKLRTAVDVEDVRREVTIMSTLPEHPNVVKLKATYEDNENVHLVMELCEGGELFDRIVARGHYTERAAATVARTIAEVVRMCHVNGVMHRDLKPENFLFANKKENSALKAIDFGLSVLFKPGERFTEIVGSPYYMAPEVLKRNYGPEVDVWSAGVILYILLCGVPPFWAETEQGVALAILRGVLDFKRDPWSQISESAKSLVKQMLEPDSTKRLTAQQVLDHPWIQNAKKAPNVPLGDIVRSRLKQFSMMNRLKKKALRVIAEHLSIQEVEVIRNMFTLMDDDNDGKISYLELRAGLRKVGSQLGEP…
AtCPK31	At4g04695.1	Arabidopsis thaliana	MGCYSSKNLKQSKRTILEKPFVDIGKVYILGDELGQGQFGITRKCVEKTSGKTYACKTILKTNLKSREDEEAVKREIRIMKHLSGEPNIVEFKKAYEDRDSVHIVMEYCGGGELFKKIEALSKDGKSYSEKEAVEIIRPIVNVVKNCHYMGVMLRDLKPENFLLSSTDKNATVKAIDFGCSVFIEEGEVHRKFAGSAYYIAPEVLQGKYGKEADIWSAGIILYILLCGKPPFVTEPEAQMFSEIKSAKIDVDSESWKFIDVKAKHLVNRMLNRNPKERISAAEVLGHPWMKDGEASDKPIDGVVLSRLKQFRDMNKLKKVALKVIAANLSEEEIKGLKTLFTNIDTDKSGTITLEELKTGLTRLGSNLSKTEVEQLMEAADVDGNGTIDIDEFISATMH…
AtCPK32	At3g57530.1	Arabidopsis thaliana	MGNCCGTAGSLAQNDNKPKKGRKKQNPFSIDYGLHHGGGDGGGRPLKLIVLNDPTGREIESKYTLGRELGRGEFGVTYLCTDKETDDVFACKSILKKKLRTAVDIEDVRREVEIMRHMPEHPNVVTLKETYEDEHAVHLVMELCEGGELFDRIVARGHYTERAAAAVTKTIMEVVQVCHKHGVMHRDLKPENFLFGNKKETAPLKAIDFGLSVFFKPGERFNEIVGSPYYMAPEVLKRNYGPEVDIWSAGVILYILLCGVPPFWAETEQGVAQAIIRSVLDFRRDPWPKVSENAKDLIRKMLDPDQKRRLTAQQVLDHPWLQNAKTAPNVSLGETVRARLKQFTVMNKLKKRALRVIAEHLSDEEASGIREGFQIMDTSQRGKINIDELKIGLQKLGHA…
AtCPK33	At1g50700.1	Arabidopsis thaliana	MGNCLAKKYGLVMKPQQNGERSVEIENRRRSTHQDPSKISTGTNQPPPWRNPAKHSGAAAILEKPYEDVKLFYTLSKELGRGQFGVTYLCTEKSTGKRFACKSISKKKLVTKGDKEDMRREIQIMQHLSGQPNIVEFKGAYEDEKAVNLVMELCAGGELFDRILAKGHYSERAAASVCRQIVNVVNICHFMGVMHRDLKPENFLLSSKDEKALIKATDFGLSVFIEEGRVYKDIVGSAYYVAPEVLKRRYGKEIDIWSAGIILYILLSGVPPFWAETEKGIFDAILEGEIDFESQPWPSISNSAKDLVRRMLTQDPKRRISAAEVLKHPWLREGGEASDKPIDSAVLSRMKQFRAMNKLKKLALKVIAENIDTEEIQGLKAMFANIDTDNSGTITYEEL…
AtCPK34	At5g19360.1	Arabidopsis thaliana	MGNCCSHGRDSDDNKEEPRPENGGGGVGAAEASVRASKHPPASPPPATKQGPIGPVLGRPMEDVKSSYTLGKELGRGQFGVTHLCTQKATGLQFACKTIAKRKLVNKEDIEDVRREVQIMHHLTGQPNIVELKGAYEDKHSVHLVMELCAGGELFDRIIAKGHYSERAAASLLRTIVQIIHTCHSMGVIHRDLKPENFLLLSKDENSPLKATDFGLSVFYKPGEVFKDIVGSAYYIAPEVLRRKYGPEADIWSIGVMLYILLCGVPPFWAESENGIFNAILSGQVDFSSDPWPVISPQAKDLVRKMLNSDPKQRLTAAQVLNHPWIKEDGEAPDVPLDNAVMSRLKQFKAMNNFKKVALRVIAGCLSEEEIMGLKEMFKGMDTDNSGTITLEELRQGLA…
OsCPK1	Os01g43410.1	Oryza sativa	MGNRTSRHHRAAPEQPPPQPKPKPQPQQQQQQWPRPQQPTPPPAAAPDAAMGRVLGRPMEDVRATYTFGRELGRGQFGVTYLVTHKATGKRFACKSIATRKLAHRDDIEDVRREVQIMHHLTGHRNIVELRGAYEDRHSVNLIMELCEGGELFDRIIARGHYSERAAAALCREIVAVVHSCHSMGVFHRDLKPENFLFLSKSEDSPLKATDFGLSVFFKPGEHFKDLVGSAYYVAPEVLKRNYGAEADIWSAGVILYILLSGVPPFWAESEDGIFDAVLRGHIDFSSEPWPSISNGAKDLVKKMLRQDPKERLTSAEILNHPWIREDGEAPDKPLDITVISRMKQFRAMNKLKKVALKVVAENLSDEEITGLKEMFRSLDTDNSGTITLEELRSGLPKL…
OsCPK2	Os01g59360.1	Oryza sativa	MGNCCPGSGDAEPASSDASTGNGSSSFKAGASPSSAPAQNKPPAPIGPVLGRPMEDVRSIYTIGKELGRGQFGVTSLCTHKATGQKFACKTIAKRKLSTKEDVEDVRREVQIMYHLAGQPNVVELKGAYEDKQSVHLVMELCAGGELFDRIIAKGHYTERAAASLLRTIVEIIHTCHSLGVIHRDLKPENFLLLSKDEDAPLKATDFGLSVFFKQGEVFKDIVGSAYYIAPEVLKRSYGPEADIWSVGVILYILLCGVPPFWAESEHGIFNSILRGQVDFTSDPWPRISASAKDLVRKMLNSDPKKRISAYEVLNHPWIKEDGEAPDTPLDNAVMNRLKQFRAMNQFKKAALRVIAGCLSEEEIRGLKEMFKSMDSDNSGTITVDELRKGLSKQGTKLT…
OsCPK3	Os01g61590.1	Oryza sativa	MGNCCRSPAAAAREDVKSSHFPASAGKKKPHQARNGGVGGGGGGGGGGGGGGGAGQKRLPVLGEEGCELIGGIDDKYALDRELGRGEFGVTYLCMDRDTKELLACKSISKRKLRTAVDVEDVRREVAIMRHLPKSASIVSLREACEDEGAVHLVMELCEGGELFDRIVARGHYTERAAANVTRTIVEVVQLCHRHGVIHRDLKPENFLFANKKENSPLKAIDFGLSIFFKPGEKFSEIVGSPYYMAPEVLKRNYGPEIDIWSAGVILYILLCGVPPFWAETEQGVAQAILRGNIDFKREPWPNVSENAKDLVRRMLEPDPKLRLTAKQVLEHPWLQNAKKAPNVPLGDIVKSRLKQFSRMNRFKRRALRVIADHLSAEEVEDIKEMFKAMDTDNDGIVS…
OsCPK4	Os02g03410.2	Oryza sativa	MGACFSSHTATAAADGGSGKRQQRKGDHKGKLPDGGGGEKEKEAARVEFGYERDFEGRYQVGRLLGHGQFGYTFAATDRASGDRVAVKRIDKAKMVRPVAVEDVKREVKILKELKGHENIVHFYNAFEDDSYVYIVMELCEGGELLDRILAKKNSRYSEKDAAVVVRQMLKVAAECHLHGLVHRDMKPENFLFKSTKEDSPLKATDFGLSDFIKPGKKFHDIVGSAYYVAPEVLKRRSGPESDVWSIGVITYILLCGRRPFWNKTEDGIFREVLRNKPDFRKKPWPGISSGAKDFVKKLLVKNPRARLTAAQALSHPWVREGGEASEIPVDISVLSNMRQFVKYSRFKQFALRALASTLKEEELADLKDQFDAIDVDKSGSISIEEMRHALAKDLPWRL…
OsCPK5	Os02g46090.1	Oryza sativa	MGNTCGVTLRSKYFASFRGASQRHDEAGYAPVATSAAAAAAADEPAGKKAPRGSAAAADAPHAASMKRGAPAPAELTANVLGHPTPSLSEHYALGRKLGQGQFGTTYLCTDLATGVDYACKSIAKRKLITKEDVEDVRREIQIMHHLAGHRNVVAIKGAYEDPQYVHIVMELCAGGELFDRIIERGQFSERKAAELTRIIVGVIEACHSLGVIHRDLKPENFLLANKDDDLSLKAIDFGLSVFFKPGQVFTDVVGSPYYVAPEVLRKCYGPEADVWTAGVILYILLSGVPPFWAETQQGIFDAVLKGVIDFDSDPWPVISDSAKDLIRRMLNPRPKERLTAHEVLCHPWICDHGVAPDRPLDPAVLSRIKQFSAMNKLKKMALRVIAESLSEEEIAGLK…
OsCPK6	Os02g58520.1	Oryza sativa	MGNYYSCGASSTSSPTSPSLVDYYYCYHRYPSSCSSTSTATSSGGRMPIRSHQQRLSSPTAVLGHETPALREVYTVGRKLGQGQFGTTYLCTQVSTGAEYACKSIAKRKLLSPEDVEDVRREIQIMHHLAGHGSVVTIQGAYEDNLYVHIVMELCEGGELFDRIVERGYFSERKAAEITRVIVGVVEACHSLGVMHRDLKPENFLLKESSSSSSLKAIDFGLSVFFKPGQVFSDVVGSPYYVAPEVLCKHYGPEADVWTAGVIVYILLSGVPPFWAETQQGIFDAVLRGSLDFDSDPWPTISDSAKDLIRRMLRSPPRERLTAHQVLCHPWVCDDGVAPDRPLAPAVLSRLKQFSAMNRLKKMALRVIARNLSEEELAGLKEMFKAMDTDASGAITFDE…
OsCPK7	Os03g03660.1	Oryza sativa	MGNQCQNGTLGSDYHNRFPREHAVGYVQGDSYLDLKKFDDTWPEVNNFKPTAASILRRGLDPTSINVLGRKTADLREHYIIGRKLGQGQFGTTYLCTEINTGCEYACKTIPKRKLITKEDVEDVRREIQIMHHLSGHKNVVAIKDVYEDGQAVHIVMELCAGGELFDRIQEKGHYSERKAAELIRIIVSIVAMCHSLGVMHRDLKPENFLLLDKDDDLSIKAIDFGLSVFFKPGQVFTELVGSPYYVAPEVLHKRYGPESDVWSAGVILYVLLSGVPPFWAETQQGIFDAVLKGHIDFQSDPWPKISDSAKDLIRKMLSHCPSERLKAHEVLRHPWICENGVATDQALDPSVISRLKQFSAMNKLKKLALRVIAERLSEEEIAGLREMFKAVDTKNRGV…
OsCPK8	Os03g59390.1	Oryza sativa	MGNCCGTPATAEEGGKRRRRGKQKKANPFTVAYNRAPSSAGAAAGRPGLMVLRDPTGRDLGARYELGGELGRGEFGITYLCTEAETGDRYACKSISKRKLRTPVDVEDVRREVEIMRHMPSHPNIVSLRAAYEDEDNVHLVMELCEGGELFDRIVARGHYTERAAAAVTRTIVEVVQMCHRHGVMHRDLKPENFLYANKKDSSPLKAIDFGLSVFFRPGERFTEIVGSPYYMAPEVLKRHYGPEVDVWSAGVILYILLCGVPPFWAETEQGVAQAIIRSVVDFKREPWPRVSEPAKDLVKRMLDPNPMTRLTAEQVLEHPWLHDSKKMPDIPLGDAVRARLQQFAAMNKLKKKALKVIAEHLSAEEAADIKDMFDKMDVSKNGQLTFEDFKAGIRKLGN…
OsCPK9	Os03g48270.1	Oryza sativa	MGNTCCVAPATTDEVGAPPRDHHHAAKKSPAPSATTTTATRQRHGQEPKPKPKPRARAKPNPYDWAPPRVLPARGGAAASAVRVLEGVVPHHPRLRVTDKYQLGRELGRGEFGVTHLATDRATRERLACKSIPKRRLRTAVDVADVRREVAIMASLPDHPALVRLRAAYEDADAVHLVMELCDGGELFDRIVARGRYTERAAAAAARTVAEVVRACHAHGVMHRDLKPENFLYAGKAEDAQLKAIDFGLSVFFRPGERFREIVGSPYYMAPEVLRRDYGPEVDIWSAGVILYILLCGVPPFWAETEQGVARAILRGAADFDREPWPRISRAAKSLVRQMLDVDPRRRPTAQQVLDHPWLHHAARAPNVPLGDVVRARLKQFSLMNRLKKKAMRVIAEHL…
OsCPK10	Os03g57450.1	Oryza sativa	MGNTCVGPSISKNGFFQSVSTVLWKARQDGDDALPGANGAPDGGGQGRLPAPPPPTSDAPLAVQNKPPEHVKIVSTTDTASAEQDASKSSAGSDSGEAARPRPRVPPVKRVSSAGLLVGSVLKRKTESLKDKYSLGRKLGQGQFGTTYLCVERATGKEFACKSILKRKLVTDDDVEDVRREIQIMYHLAGHPNVISIRGAYEDAVAVHLVMELCAGGELFDRIVQKGHYTERKAAELARVIVGVVEVCHSMGVMHRDLKPENFLFADQTEEAALKTIDFGLSIFFRPGQVFTDVVGSPYYVAPEVLKKKYGQEADVWSAGVIIYILLCGVPPFWAENEQGIFEEVLHGRLDFQSEPWPSISEGAKDLVRRMLVRDPKKRLTAHEVLRHPWVQVGGLAPD…
OsCPK11	Os03g57510.1	Oryza sativa	MGNNCVGPSAAGQNGFFANVALWRPRPADAAPPALPPPSSAPSDQAPEPVTIPPSEHSSHHSSRSTDPSTPTSAAEQPANKAAPKVKRVQSAGLLADSVLKRDVNTARLKDLYTIGKKLGQGQFGTTYLCVEKATGREFACKSIAKRKLLTQEDVEDVRREIQIMHHLAGHANVVSIVGAYEDAVAVQLVMELCAGGELFDRIIQRGHYSEKAAAQLARVIVGVIEACHSLGVMHRDLKPENFLFIHQKEDSPLKAIDFGLSIFFKPGETFTDVVGSPYYVAPEVLMKHYGREVDVWSAGVIIYILLSGVPPFWDESEQGIFEQVLKGDLDFSSEPWPNISESAKDLVRKMLIRDPKKRLTAHEALCHPWVCVDGVAPDKPLDSAVLSRLKQFSAMNKL…
OsCPK12	Os04g47300.1	Oryza sativa	MGNCFTKTYEIPITSGTMRRPASTAERSKARGGDEPGTWRRPSFPRHGAPPHRPPTGSSSAAGALSRRASGGGGEMGPVLQRAMVSVRSLYQLDRKLGSGQFGTTYLCTERATGNRYACKSVSKRKLVRRTDVDDVRREITILQHLSGQPNIAEFRGAYEDNDHVHLVMEFCSGGELFDRITAKGSYSERQAAAVCRDILTVVHVCHFMGVIHRDLKPENFLLASADDDAPLKAIDFGLSVFIEEGKVYKDIVGSAYYVAPEVLQRNYGKEADIWSAGVILYILLCGTPPFWAETEKGIFDAILVNQVDFSTSPWPSISESAKDLIRQMLHRDPQKRITASQALEHRWLKEGGASDRPIDSAVLSRMKQFKAMNKLKQLALKVIAENLSPEEIKGLKQM…
OsCPK13	Os04g49510.1	Oryza sativa	MGNACGGSLRSKYLSFKQTASQRHDTDDNNNAAAADSPKKPSRPPAAAKTDDHPVSASAPAAAMRRGQAPADLGSVLGHPTPNLRDLYAMGRKLGQGQFGTTYLCTELSTGVDYACKSISKRKLITKEDIEDVRREIQIMHHLSGHKNVVAIKGAYEDQLYVHIVMELCAGGELFDRIIQRGHYSERKAAELTRIIVGVVEACHSLGVMHRDLKPENFLLANKDDDLSLKAIDFGLSVFFKPGQTFTDVVGSPYYVAPEVLLKHYGPEADVWTAGVILYILLSGVPPFWAETQQGIFDAVLKGFIDFDSDPWPVISESAKDLITKMLNPRPKERLTAHEVLCHPWIRDHGVAPDRPLDPAVLSRIKQFSAMNKLKKMALRVIAESLSEEEIAGLKEMFQ…
OsCPK14	Os05g41270.1	Oryza sativa	MGNCCPPGSSSEPDPPPASSGSSRPAGSAGAAASPATISPSAAPAPAKPPAPIGPVLGRPMEDVKSIYTVGKELGRGQFGVTSLCTHKATGQRFACKTISKRKLSTKEDVEDVRREVQIMYHLAGQPGVVELKGAYEDKHAVHLVMELCAGGELFDRIIAKGHYTEHAASSLLRTIVEIIHTCHSMGVIHRDLKPENFLLLSKDEHAPLKATDFGLSVFFKEGEVFRDIVGSAYYIAPEVLKRSYGPEADIWSIGVMLYILLCGVPPFWAESEHGIFNSILRGHVDFSSEPWSRISHGAKDLVRRMLHSDPKQRISAYDVLNHPWIKEDGEAPDTPLDNAVLGRLKQFRAMNQFKKAALRVIAGCLSEEEIRGLKEMFKSMDSDNSGTITVDELRKGLA…
OsCPK15	Os05g50810.1	Oryza sativa	MVSSSSSPQSKPPKPKPKPLSPPMGARASRHRQSPDQSQSQSPSPHHKHHHHHQTTRAPKPKPKPQPPPPQQPRSQPPPPPRHQPQQAPQQAAAEDGVGRVLGRPMEDVRATYTFGRELGRGQFGVTYLATHKPTGRRYACKSIAARKLARPDDLDDVRREVHIMHHLTGHRNIVELRGAYEDRHSVNLVMELCEGGELFDRIIARGHYSERAAAALCREIVSVVHSCHSMGVMHRDLKPENFLFLNKREDSPLKATDFGLSVFFKPGEQFRDLVGSAYYVAPEVLKRLYGAEADIWSAGVILYILLSGVPPFWAENEDGIFDAVLQGHIDFSSEPWPSISSGAKDLVKRMLRQDPKERLTAAEILNHPWIREDGEAPDKPLDITVISRMKQFRAMNKL…
OsCPK16	Os05g39090.1	Oryza sativa	MGNCCRSPAAAAREDVKTSHFPASTGGGKKKPHQARNGGGGGGGGGGGGWEKKRLSVLGEEGSEVNGGIEEKYALDRELGRGEFGVTYLCMDRCSRELLACKSISKRKLRTPVDVEDVRREVAIMRHLPRSASIVSLREACEDDGAVHLVMELCEGGELFDRIVARGHYTERAAAAVTRTIVEVVQLCHRHGVIHRDLKPENFLFANKKENSPLKAIDFGLSIFFKPGEKFSEIVGSPYYMAPEVLKRNYGPEIDIWSAGVILYILLCGVPPFWAETEQGVAQAILRGNIDFKREPWPNVSDNAKDLVRQMLQPDPKLRLTAKQVLEHTWLQNAKKAPNVPLGDIVKSRLKQFSRMNRFKRRALRVIADHLSAEEVEDIKDMFKVMDTDNDGIVSYEEL…
OsCPK17	Os07g06740.1	Oryza sativa	MGNTCVGPSSAADRHGFFHSVSLAVLWRPGGRAEPSQPPGYPPRESSHSSVTSSTAPERVTIADSDLSSSTPNKGGNKPKVRRVQSAGLLADSVLKRDSERLKDLYTLGKKLGQGQFGTTYQCVEKATGKVLACKSIAKRKLVSEEDVEDVRREIQIMHHLAGHPSVVSIVGAYEDAVAVHLVMELCAGGELFDRIVQRGHYSEKAAAQLARVIIGVVEACHSLGVMHRDLKPENFLFVNHKEDSPLKTIDFGLSIFFKPGENYSDVVGSPYYVAPEVLMKHYGREVDVWSAGVIIYILLSGVPPFWDESEQGIFEKVLKGDLDFSSDPWPAISDSAKDLVRKMLNRDPRKRLTAHEALCHPWVCVDGVAPDKPLDSAVLTRLKQFSAMNKLKKMALRV…
OsCPK18	Os07g22710.1	Oryza sativa	MGLCSSSSARRDAGTPGGGNGAGNKDNAGRKGIVACGKRTDFGYDKDFEARYALGKLLGHGQFGYTFAAVDRRSSERVAVKRIDKNKMVLPVAVEDVKREVKILKALQGHENVVHFYNAFEDDNYVYIVMELCEGGELLDRILAKKDSRYSEKDAAVVVRQMLKVAAECHLHGLVHRDMKPENFLFKSTKEDSSLKATDFGLSDFIRPGKHFRDIVGSAYYVAPEVLKRKSGPESDVWSIGVITYILLCGRRPFWDKTEDGIFKEVLKNKPDFRRKPWPNITPCAKDFVQKLLVKDPRARLTAAQALSHEWVREGGQASDIPLDISVLHNMRQFVKYSRFKQFALRALASTLNAEELSDLRDQFNAIDVDKNGTISLEELKQALAKDVPWRLKGPRVLE…
OsCPK19	Os07g33110.1	Oryza sativa	MGSCCSRATSPDSGRGGANGYGYSHQTKPAQTTPSYNHPQPPPPAEVRYTPSAMNPPVVPPVVAPPKPTPDTILGKPYDDVRSVYSLGKELGRGQFGVTYLCTEIASGKQYACKSISKRKLVSKADKEDIRREIQIMQHLSGQQNIVEFRGAYEDKSNVHVVMELCAGGELFDRIIAKGHYSERAAATICRAVVNVVNICHFMGVMHRDLKPENFLLATKEENAMLKATDFGLSVFIEEGKMYRDIVGSAYYVAPEVLRRNYGKEIDVWSAGVILYILLSGVPPFWAETEKGIFDAILQGEIDFESQPWPSISESAKDLVRKMLTQDPKKRITSAQVLQHPWLRDGEASDKPIDSAVLSRMKQFRAMNKLKKMALKVIASNLNEEEIKGLKQMFTNMDT…
OsCPK20	Os07g38120.1	Oryza sativa	MGNCCVTPEGSGRGRKKQQQEQKQKQKEPKQQQQQQKKGKKPNPFSIEYNRSSAPSGHRLVVLREPTGRDIAARYELGGELGRGEFGVTYLCTERETGDAYACKSISKKKLRTAVDIEDVRREVDIMRHLPKHPNIVTLRDTYEDDNAVHLVMELCEGGELFDRIVARGHYTERAAALVTRTIVEVVQMCHKHGVMHRDLKPENFLFANKKETAALKAIDFGLSVFFTPGERFTEIVGSPYYMAPEVLKRNYGPEVDVWSAGVILYILLCGVPPFWAETEQGVAQAIIRSVIDFKRDPWPRVSDNAKDLVKGMLNPDPRRRLNAQQVLDHPWLQNIKKAPNVNLGETVKARLQQFSVMNKFKKHALRVIAEHLSVEEVAGIKDMFEKMDLNKDNMINFD…
OsCPK21	Os08g42750.1	Oryza sativa	MGGCYSAYASSRKLRGRISKISLVIPDPVPDAEAASPRKDGVDGDGDDVRGGGGGCDDGGDVVAIATTTADEFARRYVLGKELGRGEFGVTRRCSDAATGEALACKTIRKHRRLAPPRVTAAKAAAAHGEDVKREVAIMRRMSSASSSRGGGAASSAAVVRLREACEDAADGSVHLVMELCEGGELFDRIVARGHYSERAAANIFRTIVDVVQLCHSNGVIHRDLKPENFLFANKSEDSPLKVIDFGLSVFFKPGDRFTEVVGSAYYMAPEVLRRSYGPEVDVWSAGVILYILLCGVPPFWGDNDEKIAQAILRGAIDFNREPLPRVSANAKDLVRRMLDPNPSTRLTAKQVLEHPWLKNADTAPNVSLGDAVRARLQQFSAMNKFKKKALGVVARNLP…
OsCPK22	Os09g33910.1	Oryza sativa	MGGCSSAFAVSTRMIRFSRGRVPAAILPVTSNDEPCCSCSPENNNKNNDGGGGGCDGGEHQKGKSWRRWQYRRCGGGGGGGGGRKNAILGDAADVKTAAGFAERYRLGAELGRGEFGVTRRCSDAATGEALACKTIRRKRLRRCRGDAEDVRREVEILRRISALGAGADSVVRLRDACEDSDGVHLVMELCEGGELFDRIFARGHYTERAAAKLARTIVGVVQLCHENGVMHRDLKPENFLFANKSEDSPLKAIDFGLSVFFKPGERFTQVVGSTYYMAPEVLNRSYGPEADVWSAGVILYILLCGVPPFWGDNDEKTVTAILQGGINFQREPWPKVSPHAKDLVSKMLDPDPSTRLTAKEVLEHPWLKNADRAPNVSLGEIVRSRLMQFSAMNKFKKK…
OsCPK23	Os10g39420.1	Oryza sativa	MGNSCQNGTYGNNYQNSNRFQNDRFASRYVDGNDTEDCYSGSSRASLAGALRQGLNLKSPVLGYKTPNVRELYTLGRELGQGQFGKTYLCTEISTGCQYACKTILKSNLRCVSDIEDVRREIQIMHHLSGQKNIVTIKDTYEDEQAVHIVMELCAGGELFSKIQKRGHYSERKAAELIKIIVGIIETCHSHGVMHRDLKPENFLLLDADDEFSVKAIDFGLSVFFRPGQVFREVVGSPYYIAPEVLEKRYGPEADIWTAGVILYVLLTGVPPFWADTQSGIYEKVLDGRIDFKSNRWPRISDSAKDLIKKMLCPYPSERLKAHEVLKHPWICDNGVATNRALDPSVLPRLKQFSAMNRLKKLSLQIIAERLSEEEIVGLREMFKAMDTKNRSVVTFGEL…
OsCPK24	Os11g07040.1	Oryza sativa	MQPDPSGSGGDGNANAKAKLAPPPVTAAGGRPVSVLPHKTANVRDHYRIGKKLGQGQFGTTYLCVDKASGGEFACKSIPKRKLLCREDYEDVWREIQIMHHLSEHPNVVRIRGAYEDALFVHIVMELCAGGELFDRIVAKGHYTERAAAQLIRTIVAVVEGCHSLGVMHRDLKPENFLFASAAEDAPLKATDFGLSMFYKPGDKFSDVVGSPYYVAPEVLQKCYGPESDVWSAGVILYILLCGVPPFWAETEAGIFRQILRGKLDFESEPWPSISDSAKDLVRNMLCRDPTKRLTAHEVLCHPWIVDDAVAPDKPIDSAVLSRLKHFSAMNKLKKMALRVIAESLSEEEIGGLKELFKMIDTDDSGTITFDELKEGLKRVGSELTEHEIQALMEAADID…
OsCPK25	Os11g04170.1	Oryza sativa	MGQCCTGGGKAVAGDEAEPGTSKAAPPSRGTSSKNGSAKQQPCSPAAKAAATEAAAAASSSKKPAGPIGEVLERPMEEVRTTYSIGKELGRGQFGVTHLCTHKATGEKLACKTIAKRKLANKEDVDDVRREVQIMHHLSGQPNIVDLRGAYEDKHNVHLVMELCAGGELFDRIIARGHYTERAAAALLRAIVGIVHTCHSMGVIHRDLKPENFLLLSKGDDAPLKATDFGLSVFFKEGEVFRDIVGSAYYIAPEVLKRKYGPEADIWSIGVMLYIFLAGVPPFWAESENAIFTAILRGQIDLASEPWPKISSGAKDLVRKMLNINPKERLTAFQVLNHPWIKEDGDAPDVPLDNVVLNRLKQFRAMNQFKKAALRIIAGCLSEEEIKGLKEMFKNIDKD…
OsCPK26	Os12g03970.1	Oryza sativa	MGQCCTGGGKAVAGDEAEPGTSKAAPPSRGTSSKNGSAKQQPCSPAAKAAATEAAAAASSSKKPAGPIGEVLERPMEEVRTTYSIGKELGRGQFGVTHLCTHKATGEKLACKTIAKRKLANKEDVDDVRREVQIMHHLSGQPNIVDLRGAYEDKHNVHLVMELCAGGELFDRIIARGHYTERAAAALLRAIVGIVHTCHSMGVIHRDLKPENFLLLSKGDDAPLKATDFGLSVFFKEGEVFRDIVGSAYYIAPEVLKRKYGPEADIWSIGVMLYIFLAGVPPFWAESENAIFAAILRGQIDLASEPWPKISSGAKDLVRKMLNINPKERLTAFQVLNHPWIKEDGDAPDVPLDNVVLNRLKQFRAMNQFKKAALRIIAGCLSEEEIKGLKEMFKNIDKD…
OsCPK27	Os12g30150.1	Oryza sativa	MGNVCIGPRRNFAKNGLLGILRPRHAAPSSPSQPTTTSRSIPVVLPSAPSSKPPPPTQTAPPVPVVISEPPPPQPQPEPQPAAPSQPPPPQEQPSPPPPASSNTTQQPPPPQQRQQSRAKKPAHIKRISSAGLQVESVLRRKTENLKDKYSLGRKLGQGQFGTTYLCVDKANGGEYACKSIAKRKLLTDEDVEDVRREIQIMHHLAGHPNIISIRGAYEDAVAVHVVMELCAGGELFDRIVRKGHYTERQAAGLARVIVAVVESCHSLGVMHRDLKPENFLFVGNEEDAPLKTIDFGLSMFFRPGEVFTDVVGSPYYVAPEVLKKSYGQEADVWSAGVIIYILLCGVPPFWAETEQGIFEQVLHGTLDFESDPWPNVSDGAKDLLRKVLVRDPKKRLTA…
OsCPK28	Os12g07230.1	Oryza sativa	MQPDPQPHGRGREKAAGAGPRLPPPVTAPSVGRPASVLPHKTANVRDHYRIGKKLGQGQFGTTYLCVGKPDGGEYACKSIPKRKLLCREDYEDVWREIQIMHHLSEHPNVVRIRGAYEDALFVHIVMELCAGGELFDRIVAKGHYTERAAALLIRTIVGVVEGCHSLGVMHRDLKPENFLFASTAEDAPLKATDFGLSVFYKPGDKFSDVVGSPYYVAPEVLQKIYGPEADVWSAGVILYILLCGVPPFWAETESGIFRQILRGKLDLESDPWPSISDSAKDLVRNMLIRDPTKRFTAHEVLCHPWIVDDAVAPDKPIDSAVLSRLKHFSAMNKLKKMALRVIAESLSEEEIGGLKELFKMIDTDNSGTITYDELKNGLKRVGSDLMEPEIQALMDAAD…
OsCPK29	Os12g12860.1	Oryza sativa	MGNCCVSRPSGADKRRRCGSSTAPHTRGGRRVIGAANMRCLSTVSSVSDAARAVMSNEPATVLGNSGSSGNGGVMAAEEMLRRYEIGEELGRGEFGVTRRCRDAVTGERLACKSISKRKLRSSVDVEDVRREVAIMRSLPAHANVVRLREAFEDADAVHLVMEVCEGGELFDRIVARGHYTERAAAAVMRTIMDVVQHCHKNGVMHRDLKPENFLYANASENSPLKVIDFGLSVCFKPGARFNEIVGSPYYMAPEVLKRNYGQEIDIWSAGVILYILLCGVPPFWAETDEGIAQAIIRSHIDFQREPWPKVSDNAKDLVRRMLDPNPYTRLTAQQVLEHPWIQNASAAPNIPLGEAVRSRLKQFTVMNKFKKKALLVVAEYLPTEELDAIRELFNMLDT…
AkCDPK1	evm.model.CTG_17200.13.1_Akon	Amorphophallus konjac	MVDSIRQEPSFRYSPRPSSVLPHKTPNLRDLYQMGKKLGQGQFGTTFLCVDKSTGLQYACKSIPKRKLLCREDYEDVWREIQIMHHLSEHPNVVRIKGAYEDAVFVHLVMELCAGGELFDRIVQKGHYSERKAAQLIKTIVGVVEACHSLGVMHRDLKPENFLFVNQDEDAPLKATDFGLSVFYKPGDTFSDVVGSPYYVAPEVLRKYYGPESDVWSAGVILYILLSGVPPFWAETEAGIFRQILQGPLDFESEPWPCISESAKDLIRNMLNRNPKKRFTAHEVLCHPWIIDDKVAPDRPLDSAVLSRLKQFSAMNKLKKMALRVIAERLSEEEIGGLKELFKMIDTDNSGTITFDELKNGLKRVGSELMESEIQALMDAADIDNSGSIDYAEFIAATV…
AkCDPK2	evm.model.CTG_17475.4_Akon	Amorphophallus konjac	MGNCCTAPANSAFFKSTRNRRCLSSISSDDDGDVDVVVVRPPQEAAPPFVSFLKGNVLTAGAGGDLLQRYRLGAELGRGEFGVTRRCEDLETGEAALACKTISKRKLRTLVDVEDVRREVAIMRSLPPHTNVVGIREAYEDAEAVHIVMELCEGGELFDRIVARGHYGERAAAGVIKTIVEVVQHCHQHGVMHRDLKPENFLFANKTENSPLKVIDFGLSVFFEPGDRFKDIVGSPYYMAPEVLKRNYGPEADVWSAGVILYILLCGVPPFWAETDEGIAQAIVKSVINLEREPWPKVSEDAKDLVIQMLDPNPYTRLTATQALEHPWLQNAKTSPSTCLGQAVIAKLRQFSAMNKFKKRALRVIAEQLSVDEIAGINQMFHMMDTDKNGNLTFEELKE…
AkCDPK3	evm.model.CTG_18290.6_Akon	Amorphophallus konjac	MGTVLQKPLVDVAALFVLDKELGRGQFGITYLCTERSTGRKYACKSISKRKLVSKSDVQDMRREVMILQHLTGQPNIVEFRGAYEDAQNVHVVMELCAGGELFDRIVARGSYSEREAARICRSIVNVVHVCHFMGVMHRDLKPENFLLVSRDDNSEIKATDFGLSVFIEEGRIYRDIVGSAYYVAPEVLRRSYGKEIDVWSAGVILYILLCGVPPFWAETEKGIFDGILQGDVDFQSHPWPSISEGAKDLVTKMLTQDPKKRITAAQALDHPWLREGGDASDKPIDSAVLIRMKQFRAMNKLKKLALKVIAENLSEEEIKGLKQMFRNMDTDASGTITYDELKTGLTKLGSKLSESEVRQLMDAADVDQSGSIDYIEFITATMHRHKLEKEENLKKAFQ…
AkCDPK4	evm.model.CTG_20042.12_Akon	Amorphophallus konjac	MSKQGIRRLSDDYEVADVLGRGGFSVVRRGVSKSDGKKNQVAIKTLRRLGLTAPGMTRSHTAGRGIASLGLPSREQVSISDALLTNEILVMRKIVEDVSPHLNVINLHDVYEDLGGVHLVLELCSGGELFDRIVAHKRYSEVEAARVIRQIAEGLGALHGANIVHRDLKPENCLFLDSSEQSPLKIMDFGLSSVDELTDPIVGLFGSIDYVSPEALSRGRVSSASDMWSLGVILYILLSGCPPFHAQSNREKQQRILAGDAGFNELTWKSISSSAKQLISSLLSVDPHRRPTARDLLQHRWVIGDTAKQDLMDAEVVSRLQSFNARRKFRAAAIASVLTTKFSLRMKKLRTLLGTHDLSPEELEKLCVNFKKLCANGENATLPEFEEVLKAMNMLSLLP…
AkCDPK5	evm.model.CTG_3081.5_Akon	Amorphophallus konjac	MGNCCASPASVSAQKPKPNKEKRPNPFTLTHKRAPPPGNKLTVLKDPTGKDIGSHYELGKELGRGEFGVTYLCTDRAAGEAFACKSISKRKLRTAVDVDDVRREVDIMRHLPTHPNVVSLKDTYEDEGAVHLVMELCGGGELFDRIVARGHYTERAAAAVTGTIVEVVQMCHKHGVMHRDLKPENFLFANEKEASPLKAIDFGLSIFFKPGEKFTEIVGSPYYMAPEVLKRNYGPEVDVWSAGVILYILLCGVPPFWAETEEGVAQAIIRCSIDFKRDPWPKVSDNAKDLVKRMLEPDPAKRLTAQDVLGHPWLQNAKKAPNVPLGETVRARLKQFTVMNKFKKKALRVVAEHLSVEEAAGIKEMFQMMDINNNGKITLEELKIGLHKLGQQIPDPDVK…
AkCDPK6	evm.model.CTG_9134.3_Akon	Amorphophallus konjac	MGHCFSKGKVFESGGNGYGDWVPQQRPGPSVPDTHYAPPSPEKQTPSSPPRPKPVLAPGAILGKPFEDLNAHYTLGTELGRGQFGVTYLCTDNATGHQYACKSISKRKLVHKSDKEDVKREIQIMQHLSGQQNVVGFKGTFEDKQSVHVVMELCDGGELFDRIIAKGHYSERAAATICRSIVNVVHICHFMGVMHRDLKPENFLLATKGEGAMLKATDFGLSVFIEEGKVYKDIVGSAYYVAPEVLKRKYGKEIDIWSAGVILYILLSGVPPFWAETDRGIFDAILQGNIDFESTPWPSISNSAKDLVRKMLTQDPKKRITSAQVLEHPWIREDGEPSDKPIDNAVLSRMKQFRAMNKLKKMALKVIAENLSEEEIRGSKQMFLNMDADKSGTITYEEL…
AkCDPK7	evm.model.HIC_ASM_0.4363_Akon	Amorphophallus konjac	MGNCCRSPAAVAREDVKCGQQRDHGRRDRGARGGDHNGGGGSGSGGGQKRMTVLEEGGYSTSKAGIEEKYLMDRELGRGEFGITYLCMDRGTRELLACKSISKRKLRTAVDVEDVRREVAIMRHLPKSPSIVSLREACEDDLAVHLVMELCEGGELFDRIVARGHYTERAAATVTRTIVEVVQLCHSHGVIHRDLKPENFLFANKKENSPLKAIDFGLSIFFKPGDRFSEIVGSPYYMAPEVLKRNYGPEIDIWSAGVILYILLCGVPPFWAESEQGVAQAILRGIIDFKREPWSSVSENARNLVRQMLEPDPKLRLTAKQVLEHPWLQNAKKAPNVPLGDVVTSRLKQFSMMNRFKRRALRVIADHLSIEEVEDIKEMFKLMDTDNDGIVSCDELKNG…
AkCDPK8	evm.model.HIC_ASM_0.4386_Akon	Amorphophallus konjac	MGNCCRSPAAVAREDVKCGQQRDHGRRDRGARGGDHNGGGGSGGGQKRMTVLEEGGYSTSKAGIEEKYLMDRELGRGEFGITYLCMDRGTRELLACKSISKRKLRTAVDVEDVRREVAIMRHLPKSPSIVSLREACEDDLAVHLVMELCEGGELFDRIVARGHYTERAAATVTRTIVEVVQLCHSHGVIHRDLKPENFLFANKKENSPLKAIDFGLSIFFKPGDRFSEIVGSPYYMAPEVLKRNYGPEIDIWSAGVILYILLCGVPPFWAESEQGVAQAILRGIIDFKREPWSSVSENARNLVRQMLEPDPKLRLTAKQVLEHPWLQNAKKAPNVPLGDVVTSRLKQFSMMNRFKRRALRVIADHLSIEEVEDIKEMFKLMDTDNDGIVSCDELKNGLS…
AkCDPK9	evm.model.HIC_ASM_0.5124_Akon	Amorphophallus konjac	MGNSCRGSFGSGYFYTEPADSSSLSSRRRRRRSSSRSSANSSEPPGHRAEDDRVAPPKQPPAAAVAATPTMRRGVDPLQTNSVLGHKTPHIRDLYTLGRKLGQGQFGTTYLCTEISTGIEYACKSISKRKLICKEDVEDVRREIQIMHHLSGHKNVVSIKGAYEDALYVHIVMELCAGGELFDRIVQRGHYSERKAAELIRIIVGVVEACHSLGVMHRDLKPENFLLANKNDDSSLKAIDFGLSVFFKPGQVFTDVVGSPYYVAPEVLCKHYGPEADIWTAGIILYILLSGVPPFWAETQQGIFDAVLKGVIDFDSEPWPLISDIAKDLIRKMLSSHPSDRPTAHEVLCHPWICENGVAPDRALDSAVLCRLKQFSAMNKLKKMALRVIAESLSEEEIA…
AkCDPK10	evm.model.HIC_ASM_0.5128_Akon	Amorphophallus konjac	MGNSCRGSFGSGYFYTEPADSSSLSSRRRRRRSSSRSSANSSEPPGHRAEDDRVAPPKQPPAAAVAATPTMRRGVDPLQTNSVLGHKTPHIRDLYTLGRKLGQGQFGTTYLCTEISTGIEYACKSISKRKLICKEDVEDVRREIQIMHHLSGHKNVVSIKGAYEDALYVHIVMELCAGGELFDRIVQRGHYSERKAAELIRIIVGVVEACHSLGVMHRDLKPENFLLANKNDDSSLKAIDFGLSVFFKPGQVFTDVVGSPYYVAPEVLCKHYGPEADIWTAGIILYILLSGVPPFWAETQQGIFDAVLKGVIDFDSEPWPLISDIAKDLIRKMLSSHPSDRPTAHEVLCHPWICENGVAPDRALDSAVLCRLKQFSAMNKLKKMALRVIAESLSEEEIA…
AkCDPK11	evm.model.HIC_ASM_0.5318_Akon	Amorphophallus konjac	MGTVLQKPLVDVAALFVLDKELGRGQFGITYLCTERSTGRKYACKSISKRKLVSKSDVQDMRREVMILQHLTGQPNIVEFRGAYEDAQNVHVVMELCAGGELFDRIVARGSYSEREAARICRSIVNVVHVCHFMGVMHRDLKPENFLLVSRDDNSEIKATDFGLSVFIEEGRIYRDIVGSAYYVAPEVLRRSYGKEIDVWSAGVILYILLCGVPPFWAETEKGIFDGILQGDVDFQSHPWPSISEGAKDLVTKMLTQDPKKRITAAQALDHPWLREGGDASDKPIDSAVLIRMKQFRAMNKLKKLALKVIAENLSEEEIKGLKQMFRNMDTDASGTITYDELKTGLTKLGSKLSESEVRQLMDAADVDQSGSIDYIEFITATMHRHKLEKEENLKKAFQ…
AkCDPK12	evm.model.HIC_ASM_0.5386_Akon	Amorphophallus konjac	MGNTCVGPRITKNGFFQSVSATLWRARAPDDVATALPTPPSSSNKDEPHVPETEAASLPVQNRPPEPVKMAEVEPPAKPPPTPAAAEQSQPKPPRKPHQVRRVASAGLRTDSVLRRKTENIKDVYSLGRKLGQGQFGTTYLCVEKATGKEFACKSIAKRKLLTEEDVEDVRREIQIMHHLAGHPNVISIVGAYEDAVAVHVVMELCAGGELFDRIIQRGHYTERKAAELARVIVGVVEACHSLGVMHRDLKPENFLFINQQEESPLKTIDFGLSIFFRPGEIFTDVVGSPYYVAPEVLRKNYGLEVDVWSAGVIIYILLSGVPPFWAETEQGIFEQVLNGSLDFESDPWPSISESAKDLVRKMLVRDPKKRLNAHEVLCHPWVQVDGVAPDKPLDSAVL…
AkCDPK13	evm.model.HIC_ASM_1.10394.2_Akon	Amorphophallus konjac	MGNCNGLPSQYDEEHPGPGGGPPPVASDCPDPQPAPKPIAEPPAAAPVPPPAAAPPQQPDEAAPPRPRSSLFSNVGRVLGRPMEDVRAIYEFGRELGRGQFGVTYLVTHKVTREVFACKSIATRNLMTRDDVEDVRREVQIMHHLTGHRNIVELKGAYEDRSSVNLVMELCEGGELFDRIIAKGHYSERAAAALFREIVTVVHNCHSMGVMHRDLKPENFLFLGKSEDSPLKATDFGLSVFFKPGEVFRDLVGSAYYVAPEVLRRHYSAEADIWSAGVILYILLSGVPPFWAENEQGIFDAILHGHIDFSSNPWPSISNSAKDLVKKMLRADPKERLTAVDVLNHPWMREDGEASDNPIDITVLTRMKQFRAMNKLKKVALKVIAEHLSEEEIVGLKEM…
AkCDPK14	evm.model.HIC_ASM_1.1830_Akon	Amorphophallus konjac	MGNCFSEDNPNKANGAAGGGDAAAADNKTGGQQQPQDQSHRPREPQRNASQQQRGRHVRRTSVIPCGKKTNFGYARDFETKYTLGKLLGHGQFGYTFVATDKANGEKVAVKRIDKNKMILPVAVDDVKREVKILQALTGHENVVQFHNAFEDESYVYIVMELCEGGELLDRILAKKDSRYTEKDAAIVVRQMLKVAAECHLHGLVHRDMKPENFLFKSTKEDSPLKATDFGLSDFIKPGRNFHDIVGSAYYVAPEVLKRKSGPESDVWSIGVITYILLCGRRPFWDKTEDGIFKEVLKNTPDFHRKPWPSISDSAKDFVNKLLVKDPRTRLTAAQALSHPWVREGGDALEIPLDISVLSNMRLFVKFSRLKQIALRALASTLDPEELADLRDQFDAMDV…
AkCDPK15	evm.model.HIC_ASM_11.3224_Akon	Amorphophallus konjac	MGNTCRGSFASKHFHEYPEPAERSSLSRRRHPSSDRGSSISSDNSGHSTAVSRHQAVAPDDDSNPHHQLLAKQLAAAPAGHKTDLISPVVVSPTMRRGVDPNSNYVLGHKTSNIRDLYVLGRKLGQGQFGTTYLCSEISTGNEYACKSISKRKLISREDVEDVRREIQIMHHLSGHKNVVTIKGAYEDPLYVHIVMELCAGGELFDRIIQRGHYSERKAAELTRIIVGVVEACHSLGVMHRDLKPENFLLVNKDDDSSLKAIDFGLSVFFKPGQIFTDVVGSPYYVAPEVLCKHYGPEADVWTAGVILYILLSGVPPFWAETQQGIFDAVLKGYIDFESDPWPIISDSAKDLIRKMLCSRPSERLTAHEVLCHPWICENGVAPDRALDAAVLSRLKHFS…
AkCDPK16	evm.model.HIC_ASM_11.5617_evm.model.HIC_ASM_11.5618_Akon	Amorphophallus konjac	MGACLSNATKVSGSSSSNAAVAANNPGEQQQQPHHQRHRKPPEAQRKPPPQQRDQNQHHQRDKEQLKRPSGVIPCGKRTNFGYDRDFESRYAIGKLLGHGQFGYTFVATNKVNGDRVAVKRIDKNKMILPIAVEDVKREVKILQALTGHENVVQFHNAFEDDTYVYIVMELCEGGELLDRILAKKDSRYSERDAAIVVRQMLKVAAECHLRGLVHRDMKPENFLFKSTKEDSALKATDFGLSDFIKPGKKFRDIVGSAYYVAPEVLKRRSGPESDVWSIGVMTYILLCGRRPFWDKTEDGIFKEVLRNKPDFRRKPWPNISDSAKDFVKKLLVKDPHARLTAAQALSHPWVREGGSAPEIPLDISVLNSMRKFVKYSRFKQFALRALASTLDPEELADL…
AkCDPK17	evm.model.HIC_ASM_4.1275_Akon	Amorphophallus konjac	MGNCFSHGDDKAAKNKDGAPSDPPAQPSQNPPPFANAGAQKPANGGGSGAPAAKQVPAKPAPMGPVLGRPMEDVRHTYNIGKELGRGQFGVTHLCTHKATGEQFACKTIAKRKLVNKEDIEDVRREVQIMHHLAGQPNIVELKGAYEDKQSVHLVMELCAGGELFDRIIARGHYTERAAASLLRTIVQIVHTCHSMGVMHRDLKPENFLLLSSDEDAPLKATDFGLSVFFKQGEVFRDIVGSAYYIAPEVLKRKYGPEVDIWSIGVMLYILLSGVPPFWAESEHGIFNAILRGHIDFTSDPWPNISVGAKDLVRKMLNSDPKQRLTAFQVLNHPWIKEDGEAPDVPLDNAVLSRLKQFRAMNKFKKVALRVIAGCLSEEEIRGLKEMFKSMDTDNSGTI…
AkCDPK18	evm.model.HIC_ASM_4.2160.1_Akon	Amorphophallus konjac	MGNCCRSPAAVAREDVKSGYDPLRRDHAGGFGGGGGNCNGGDAGAQKRLTVLKDGSYGKSKAAIEEKYMLDRELGRGEFGVTYLCMDRDTRELLACKSISKRKLRTAVDVEDVRREVAIMRHLPKSPSIVSLREACEDDQAVHLVMELCEGGELFDRIVARGHYTERAAASVTRTILEVVQLCHCHGVIHRDLKPENFLFANKKENSPLKAIDFGLSIFFKPGERFSEIVGSPYYMAPEVLKRNYGPEIDIWSAGVMLYILLCGVPPFWAESEQGVAQAILRGIIDFKRDPWPSISENAKNLVRQMLEPDPKLRLTAKQVLEHPWLQNAKKAPNVPLGDVVKSRLKQFSMMNRFKRRALRVIADHLSIDEVEDIKEMFKLIDMDNDGIVSSEELKSGLS…
AkCDPK19	evm.model.HIC_ASM_4.2288.1_Akon	Amorphophallus konjac	MVDSIRQEPSFRYSPRPSSVLPHKTPNLRDLYQMGKKLGQGQFGTTFLCVDKSTGLQYACKSIPKRKLLCREDYEDVWREIQIMHHLSEHPNVVRIKGAYEDAVFVHLVMELCAGGELFDRIVQKGHYSERKAAQLIKTIVGVVEACHSLGVMHRDLKPENFLFVNQDEDAPLKATDFGLSVFYKPGDTFSDVVGSPYYVAPEVLRKYYGPESDVWSAGVILYILLSGVPPFWAETEAGIFRQILQGPLDFESEPWPCISESAKDLIRNMLNRNPKKRFTAHEVLCHPWIIDDKVAPDRPLDSAVLSRLKQFSAMNKLKKMALRVIAERLSEEEIGGLKELFKMIDTDNSGTITFDELKNGLKRVGSELMESEIQALMDAADIDNSGSIDYAEFIAATV…
AkCDPK20	evm.model.HIC_ASM_4.2664_Akon	Amorphophallus konjac	MGNCCTAPANSAFFKSTRNRRCLSSISSDDDGDVDVVVVRPPQEAAPPFVSFLKGNVLTAGAGGDLLQRYRLGAELGRGEFGVTRRCEDLETGEAALACKTISKRKLRTLVDVEDVRREVAIMRSLPPHPNVVGIREAYEDAEAVHIVMELCEGGELFDRIVARGHYGERAAAGVIKTIVEVVQHCHQHGVMHRDLKPENFLFANKTENSPLKVIDFGLSVFFEPGDRFKDIVGSPYYMAPEVLKRNYGPEADVWSAGVILYILLCGVPPFWAETDEGIAQAIVKSVINLEREPWPKVSEDAKDLVIQMLDPNPYTRLTATQALEHPWLQNAKTSPSTCLGQAVIAKLRQFSAMNKFKKRALRVIAEQLSVDEIAGINQMFHMMDTDKNGNLTFEELKE…
AkCDPK21	evm.model.HIC_ASM_5.10001_Akon	Amorphophallus konjac	MGACLSCATKVSGSSSSNAASAAGDPAQQREQQKLRRSQGGAPKRQHHDQNRWPRDRERVRRTSGLIPCGKRTNFGYARDFESRYTIGKLLGHGQFGYTFVATDIANGDRVAVKRIDKNKMILPIAVEDVKREVNILRALTGHENVVQFYNAFEDDSYVYIVMELCDGGELLDRILAKKDTRYTEKDAAIVVRQMLKVAAECHLRGLVHRDMKPENFLFKSTKENSPLKATDFGLSDFIKPGKKFQDIVGSAYYVAPEVLKRRSGPESDVWSIGVITYILLCGRRPFWDKTEDGIFKEVLRNKPDFRRKPWPSISSSAKDFVKKLLVKDHRARYTAAQALSHPWVREGGDALEIPVDISVLNNMRQFVKYSRLKQFALRALASTLDPEELADIRDQFNA…
AkCDPK22	evm.model.HIC_ASM_5.11603_Akon	Amorphophallus konjac	MGNCCATPATGSGKKNPAKNKEKKANPFSLDYNRTPPPGSKLTVLKDPTGRDIGGRYELGQELGRGEFGVTYLCTDQETNDAYACKSISKKKLRTAVDIEDVRREVDIMKHLPSHPNIVSLKDTYEDDSAVHLVMELCEGGELFDRIVARGHYTERAAALITKTIVEVVQVCHKHGVMHRDLKPENFLFANKKETSPLKVIDFGLSVMFKPGERFTEIVGSPYYMAPEVLKRNYGPEVDVWSAGVILYILLCGVPPFWAETEQGIAQAIIRSAIDFKRDPWPKVSDNAKDLVSRMLNPDPTKRLTAQEVLDHPWLQNDKKAPNVSLGETVRARLKQFSVMNKFKKRALRVIAEHLSVEEVAGIKEMFQMMDTNNNGKITLEELKIGLHKLGQQIPDPDV…
AkCDPK23	evm.model.HIC_ASM_5.11616_Akon	Amorphophallus konjac	MGNCCATPATGSGKKNPAKNKEKKANPFSLDYNRTPPPGSKLTVLKDPTGRDIGGRYELGQELGRGEFGVTYLCTDQETNDAYACKSISKKKLRTAVDIEDVRREVDIMKHLPSHPNIVSLKDTYEDDSAVHLVMELCEGGELFDRIVARGHYTERAAALVTKTIVEVVQVCHKHGVMHRDLKPENFLFANKKETSPLKVIDFGLSVMFKPGERFTEIVGSPYYMAPEVLKRNYGPEVDVWSAGVILYILLCGVPPFWAETEQGIAQAIIRSAIDFKRDPWPKVSDNAKDLVSRMLNPDPTKRLTAQEVLDHPWLQNDKKAPNVSLGETVRARLKQFSVMNKFKKRALRVIAEHLSVEEVAGIKEMFQMMDTNNNGKITLEELKIGLHKLGQQIPDPDV…
AkCDPK24	evm.model.HIC_ASM_5.8866_Akon	Amorphophallus konjac	MGNCCCACLTPVSEESRGKEQQGNKRKEGKQQQQHGRGRRRGKDRRPNPFAEDVPSGGARPIQVLKDVVPLHSGGVRVGDKYVLGRELGRGEFGVTYLCTDRETREALACKSISKRKLRTAVDVEDVRREVAIMSALPDHPNIVRLRAAYEDADAVHLVMELCEGGELFDRIVARGHYSERAAAAVMRTMAEVVRMCHAHGVMHRDLKPENFLYADRKETSPLKAIDFGLSVFFRPGECFSEIVGSPYYMAPEVLRRNYGPEVDIWSAGVILYILLCGVPPFWAETEQGVARAILRGVIDFKRDPWPQISDSAKSLVRQMLDPDSKCRLTAQQVLEHPWLQNAKKAPNVPLGDIVRTRLKQFSVMNRLKKKAMRVIAEHLSVEEVEVIRDMFKLMDADN…
AkCDPK25	evm.model.HIC_ASM_5.9948_Akon	Amorphophallus konjac	MGACLSCATKVSGSSSSNAASAAGDPAQQREQQKLRRSQGGAPKRQHHDQNRWPRDRERVRRTSGLIPCGKRTNFGYARDFESRYTIGKLLGHGQFGYTFVATDIANGDRVAVKRIDKNKMILPIAVEDVKREVNILRALTGHENVVQFYNAFEDDSYVYIVMELCDGGELLDRILAKKDTRYTEKDAAIVVRQMLKVAAECHLHGLVHRDMKPENFLFKSTKENSPLKATDFGLSDFIKPGKKFQDIVGSAYYVAPEVLKRRSGPESDVWSIGVITYILLCGRRPFWDKTEDGIFKEVLRNKPDFRRKPWPSISSSAKDFVKKLLVKDHRARYTAAQALSHPWVREGGDALEIPVDISVLNNMRQFVKYSRLKQFALRALASTLDPEELADIRDQFNA…
AkCDPK26	evm.model.HIC_ASM_9.420_Akon	Amorphophallus konjac	MGNSCGCACLTPVSEEALDGEDLYPVPEHYQHRKKQSKEDRRGAKGKDGRKQGRGRRRRKDRANPFAEDLRIGSPNFRVLRDVVPLHSAAVRVGNKYHLGRELGRGEFGVTHLCTDKATGEAFACKSISKEKLRTAVDVEDVRREVAIMSSLPVHPNVVRLRAAYEDADAVHLVMELCRGGELFDRIVARGHYSERAAAAVARTVAEVVRVCHAHGVMHRDLKPENFLYSDEREDSPLKVIDFGLSVFFRPGDRFSEIVGSPYYMAPEILRRKYGPEVDVWSAGVILYILLCGVPPFWAETEEGVARAILRGVVDFQREPWPQISDSAKNLIRRMLEQDPKRRLTAQQVLEHPWLQNAKRAPNVPLGDLVRARLKQFAVMHRFKKKAMRIIAEHLSMEE…
AkCDPK27	evm.model.HIC_ASM_9.462_Akon	Amorphophallus konjac	MGNCCASPAGPFKKGANQKKQNKPNPYSIDYNRTPNPGIGKLAVLRDPTGHDIGGRFELGQELGRGEFGITYLCTDRATGEVLACKSISKKKLRTAVDIEDVRREVDIMRHLPPHPNLVGLKGAYEDDSAVHLVMELCEGGELFDRIVARGHYTERAAAAITKTIIEVVQMCHKHGVMHRDLKPENFLFANKKENSPLKAIDFGLSVFFKPGERFSEIVGSPYYMAPEVLKRNYGPEVDVWSAGVILYILLCGVPPFWAETEQGIAQAIIRCVIDFNRDPWPMVSDNAKDLMRRMLDPDPTKRLTAQEVLDHPWLQNAKKAPNVSLGETVRARLKQFSVMNKFKKKALRVMAEQLSVEEVAGIKEMFEMMDINKNGKITLEELKVGLHKLGQHIPDPDV…
AkCDPK28	evm.model.HIC_ASM_9.721_Akon	Amorphophallus konjac	MGNSCGCACLTPVSEEALDGEDLYPVPEHYQHRKKQSKEDRRGAKGKDGKKQGRGRRRRKDRANPFAEDLRIGSPNFRVLRDVVPLHSAAVRVGNKYHLGRELGRGEFGVTHLCTDKATGEAFACKSISKEKLRTAVDVEDVRREVAIMSSLPVHPNVVRLRAAYEDADAVHLVMELCRGGELFDRIVARGHYSERAAAAVARTVAEVVRVCHAHGVMHRDLKPENFLYSDEREDSPLKVIDFGLSVFFRPGDRFSEIVGSPYYMAPEILRRKYGPEVDVWSAGVILYILLCGVPPFWAETEEGVARAILRGVVDFQREPWPQISDSAKNLVRRMLEQDPKRRLTAQQVLEHPWLQNAKRAPNVPLGDLVRARLKQFAVMHRFKKKAMRIIAEHLSMEE…
AkCDPK29	evm.model.HIC_ASM_9.7625_Akon	Amorphophallus konjac	MGNTCVGPSATGTGFFQSVSTAVLWRARPGVDEAPALPPPPNADGSNATGGRPAGGSMTVQDTPPEPVKMHPVADDPSEKPKDPPPAEDAAATASAGVGGEGEKKGADSASATTAENRPAAPAKPVRVKRLTSAGLLTDSVLQRKTGTLKELYSLGRKLGEGQFGTTYLCVEKATGKEYACKSIALRKLLTAEDVEDVRREIQIMHHLAGHPNVISIVDAYEDAVAVHVVMELCAGGELFDRIIQRGHYSEKAAAELARVIVGVVEACHSMGVMHRDLKPENFLFADQTEESPLKTIDFGLSIFFKPGETFTDVVGSPYYVAPEVLRKYYGREVDVWSAGVIIFILLSGVPPFWDETEQGIFEQVLKGELDFVSDPWPSISDSAKDLVSRMLVRDPTKR…
