# Supplementary material for: Identification of the AKCDPK gene family and AkCDPK15 functional analysis under drought and salt stress
Source: PLoS One. 2025 Jun 11;20(6):e0325453. doi: 10.1371/journal.pone.0325453 (PMC12157117; doi:10.1371/journal.pone.0325453)
Supplement: S3 Table — (XLSX) [file pone.0325453.s003.xlsx]

## Sheet: Sheet1
Table s3 qRT-PCR primer
Primer name	Primer sequence (5'to3')	Primer product（bp）
1-AkCDPK1-F2	CCAGCAAGCATGTCGAGAGT	139
1-AkCDPK1-R2	CCCAATTCCTCCGTTGCCT
2-AkCDPK4-F	TGAAGAAGTGCTGAAGGCGA	102
2-AkCDPK4-R	CTCATGTCCACCGTCCCATC
3-AkCDPK5-F	AGCTGCTGATGTTGATGGGAA	103
3-AkCDPK5-R	AGCTTTCCGCAAGTGGTCAT
4-AkCDPK6-F	TGTAGATGGCAACGGGACAA	182
4-AkCDPK6-R	CAGCATCACCCATTCCATGC
5-AkCDPK7-F	GTGCAGGTGCTGATTGAAGC	199
5-AkCDPK7-R	CTGCTCCGTCTTCCACCAAG
6-AkCDPK9-F	ATGGATGCAGCTGATGTGGA	100
6-AkCDPK9-R	CCAAATGTTCTTCGCGTTCG
7-AkCDPK12-F	GATGCAAGCGGCAGATGTTG	197
7-AkCDPK12-R	GGACATCACCTACGCCCAAT
8-AkCDPK13-F3	ATTTCTCGTCCAATCCCTGGC	100
8-AkCDPK13-R3	TCAACTGCTGTAAGACGTTCCT
9-AkCDPK14-F	TGGGCTGGTGGACTTTGATG	175
9-AkCDPK14-R	ACCCTTCAATCCCGTTTGTGT
10-AkCDPK15-F	CTCAACAAACTGGAACGGGA	177
10-AkCDPK15-R	AATGCGGCCATCGTTATCCT
11-AkCDPK16-F	GCATGTGCATCAGCTAGTGG	137
11-AkCDPK16-R	AGCCCTTCAACCCTATGTGC
12-AkCDPK18-F	AGGATGGCTAATGACGAGCA	102
12-AkCDPK18-R	CTCCATCAATGCCTCACCGA
13-AkCDPK21-F	CTAAGAATGCACACGGGCCT	160
13-AkCDPK21-R	ACCTTTGAACACCAGACGGG
14-AkCDPK22-F	TTGATCGGGACAAGAGTGGG	190
14-AkCDPK22-R	GATGCCTTCCTCCAATCCGT
15-AkCDPK24-F	CGACAAGAATGGCAGTGGGTA	170
15-AkCDPK24-R	TACCAGCCTTCATCATCGCA
16-AkCDPK26-F	CAGACAAGGATGGCCGGATT	147
16-AkCDPK26-R	ATTGTCTCAACGAGCCCTCA
17-AkCDPK27-F	GTTGCTGTTTCGGTTCACCT	197
17-AkCDPK27-R	CGCCCATCCTTGTCGGTATC
19-AkCDPK29-F	TCAGGATGAGCTCCAACAGG	149
19-AkCDPK29-R	CTAAGCCAGCATTTCCCTGC
nc-Actin-F	GGTCCTGTTCCAGCCATCTC	142
nc-Actin-R	GAACATGGTAGACCCTCCGC
