# Supplementary material for: Identification of the AKCDPK gene family and AkCDPK15 functional analysis under drought and salt stress
Source: PLoS One. 2025 Jun 11;20(6):e0325453. doi: 10.1371/journal.pone.0325453 (PMC12157117; doi:10.1371/journal.pone.0325453)
Supplement: S4 Table — (XLSX) [file pone.0325453.s004.xlsx]

## Sheet: Sheet1
Table S4. Duplications of CDPK genes between Amorphophallus konjac and Arabidopsis thaliana.
Code	Ak-Gene 1		At-Gene 2
	Gene ID	Gene name	Gene ID	Gene name
1	evm.model.HIC_ASM_0.5318_Akon	AkCDPK11	At1g76040.1	AtCPK29
2	evm.model.HIC_ASM_5.10001_Akon	AkCDPK21	At4g36070.1	AtCPK18

## Sheet: Sheet2
Table S4. Duplications of CDPK genes between Amorphophallus konjac and Oryza sativa.
Code	Ak-Gene 1		Os-Gene 2
	Gene ID	Gene name	Gene ID	Gene name
1	evm.model.HIC_ASM_0.5124_Akon	AkCDPK9	Os02g58520.1	OsCPK6
2	evm.model.HIC_ASM_11.3224_Akon	AkCDPK15	Os04g49510.1	OsCPK13
3	evm.model.HIC_ASM_4.1275_Akon	AkCDPK17	Os05g41270.1	OsCPK14
4	evm.model.HIC_ASM_4.1275_Akon	AkCDPK17	Os01g59360.1	OsCPK2
5	evm.model.HIC_ASM_4.1275_Akon	AkCDPK17	Os11g04170.1	OsCPK25
6	evm.model.HIC_ASM_5.8866_Akon	AkCDPK24	Os03g48270.1	OsCPK9
7	evm.model.HIC_ASM_9.7625_Akon	AkCDPK29	Os03g57510.1	OsCPK11

## Sheet: Sheet3
Table S4. Duplications of CDPK genes between Arabidopsis thaliana and Oryza sativa.
Code	At-Gene 1		Os-Gene 2
	Gene ID	Gene name	Gene ID	Gene name
1	At4g04710.1	AtCPK22	Os07g33110.1	OsCPK19
