# Supplementary material for: Identification of the AKCDPK gene family and AkCDPK15 functional analysis under drought and salt stress
Source: PLoS One. 2025 Jun 11;20(6):e0325453. doi: 10.1371/journal.pone.0325453 (PMC12157117; doi:10.1371/journal.pone.0325453)
Supplement: S6 Table — (XLSX) [file pone.0325453.s006.xlsx]

## Sheet: Sheet1
Table S6. Annotation of cis-acting regulatory elements in the promoters of AkCDPK genes.
Code	Motif	Function	Sequence	AkCDPK1	AkCDPK2	AkCDPK3	AkCDPK4	AkCDPK5	AkCDPK6	AkCDPK7	AkCDPK8	AkCDPK9	AkCDPK10	AkCDPK11	AkCDPK12	AkCDPK13	AkCDPK14	AkCDPK15	AkCDPK16	AkCDPK17	AkCDPK18	AkCDPK19	AkCDPK20	AkCDPK21	AkCDPK22	AkCDPK23	AkCDPK24	AkCDPK25	AkCDPK26	AkCDPK27	AkCDPK28	AkCDPK29
1	TCA-element	salicylic acid responsiveness	CCATCTTTTT	0	0	0	1	1	0	2	2	1	2	0	0	0	1	0	0	2	1	0	0	1	0	1	0	1	3	0	3	0
2	P-box	gibberellin-responsive element	CCTTTTG	0	0	1	0	1	0	0	0	1	1	1	0	0	1	1	0	0	0	0	0	1	0	0	0	1	0	1	0	0
3	TATC-box	gibberellin responsiveness	TATCCCA	0	0	0	0	0	0	0	0	0	0	0	0	0	0	0	1	0	0	0	0	1	1	1	0	1	1	0	1	0
4	GARE-motif	gibberellin-responsive element	TCTGTTG	0	0	0	1	0	0	0	0	0	0	0	0	0	0	0	0	0	0	0	0	0	1	1	0	0	0	0	0	1
5	TGA-box	part of an auxin-responsive element	TGACGTAA	0	0	0	0	0	0	0	0	1	0	0	0	0	0	0	0	0	0	0	0	0	0	0	0	0	0	0	0	0
6	AuxRR-core	auxin responsiveness	GGTCCAT	0	0	0	0	0	0	0	0	0	0	1	0	0	0	0	0	0	0	0	0	0	0	0	0	0	0	0	0	0
7	ERE	ethylene-responsive element	ATTTTAAA	1	0	3	1	5	0	0	0	0	1	3	0	0	1	0	1	0	1	1	0	1	0	0	0	1	0	0	0	4
8	ABRE	abscisic acid responsiveness	ACGTG	0	2	5	0	4	4	4	6	9	7	5	1	6	5	10	3	4	4	1	3	3	0	0	5	2	3	4	4	2
9	CGTCA-motif	MeJA-responsivenes	CGTCA	3	2	2	1	1	4	5	4	6	3	2	2	2	2	5	1	1	2	3	3	4	1	1	7	4	2	2	2	1
10	TGACG-motif	MeJA-responsivenes	TGACG	3	2	2	1	1	4	5	4	6	3	2	2	2	2	5	1	1	2	3	3	4	1	1	7	4	2	2	2	1
11	STRE	stress-responsive element	AGGGG	8	6	4	5	7	4	9	8	5	6	5	37	7	11	8	8	12	8	8	7	9	13	13	9	9	16	11	14	5
12	ARE	anaerobic induction	AAACCA	0	2	0	2	3	2	0	0	1	1	1	0	2	1	2	0	0	3	0	2	0	3	3	1	0	0	1	0	2
13	GC-motif	enhancer-like element involved in anoxic specific inducibility	CCCCCG	2	5	0	0	0	0	2	2	0	0	0	1	1	1	2	0	1	1	2	4	1	1	1	0	1	0	2	0	2
14	DRE core	dehydration-responsive element	GCCGAC	0	1	1	1	0	2	1	1	0	0	1	2	0	1	1	0	0	1	0	1	0	0	0	0	0	2	0	2	1
15	DRE1	dehydration-responsive element	ACCGAGA	0	1	0	0	0	0	0	0	0	0	0	2	0	0	1	0	0	0	0	1	0	0	0	1	0	0	1	0	0
16	LTR	low-temperature responsiveness	CCGAAA	1	0	0	0	1	0	0	0	0	0	0	0	1	0	0	0	0	1	1	0	1	0	0	1	1	0	2	0	0
17	TC-rich repeats	defense and stress responsiveness	GTTTTCTTAC	0	2	2	0	0	1	0	0	1	2	1	0	0	0	0	0	0	0	0	2	1	0	0	0	1	0	0	0	1
18	WRE3	wound-responsive element	CCACCT	2	1	1	0	1	1	2	2	3	3	1	1	1	3	2	2	0	0	2	1	2	4	4	2	2	2	1	3	1
19	WUN-motif	wound-responsive element	AAATTTCCT	1	0	0	1	0	0	0	0	0	0	0	0	0	0	0	0	0	0	1	0	0	0	0	0	0	1	0	1	0
20	CAT-box	meristem expression	GCCACT	0	1	1	2	0	0	2	2	1	2	1	1	0	1	2	1	1	0	0	1	0	0	0	1	0	1	1	0	0
21	CCGTCC motif	cis-acting regulatory element related to meristem specific activation	CCGTCC	0	1	0	0	0	3	0	0	0	0	0	1	1	2	3	0	1	1	0	1	0	0	0	0	0	3	1	3	0
22	CCGTCC-box	meristem-specific activation	CCGTCC	0	1	0	0	0	3	0	0	0	0	0	1	1	2	3	0	1	1	0	1	0	0	0	0	0	3	1	3	0
23	MBSI	flavonoid biosynthetic genes regulation	AAAAAAC(G/C)GTTA	0	0	0	0	1	0	0	0	0	0	0	0	0	0	0	0	0	0	0	0	1	1	0	0	1	0	0	0	0
24	AC-I	flavonoid biosynthetic genes regulation	(T/C)C(T/C)(C/T)ACC(T/C)ACC	1	0	0	0	0	0	0	0	0	0	0	0	1	0	1	0	0	0	1	0	0	0	1	0	0	0	0	0	0
25	AC-II	flavonoid biosynthetic genes regulation	CCACCAACCCCC	0	0	0	0	0	0	1	1	0	0	0	1	0	0	2	0	0	0	0	0	0	0	0	0	0	0	0	0	0
26	GCN4_motif	cis-regulatory element involved in endosperm expression	TGAGTCA	0	2	0	0	0	0	0	0	0	0	0	0	0	0	0	0	0	1	0	2	0	0	0	0	0	0	0	0	1
27	RY-element	seed-specific regulation	CATGCATG	0	1	0	0	0	0	0	0	0	0	0	0	0	0	0	0	0	0	0	1	0	0	0	0	0	0	0	0	0
28	HD-Zip 1	palisade mesophyll cells	CAAT(A/T)ATTG	0	0	0	0	0	0	0	0	0	0	0	0	0	0	0	0	0	0	0	0	0	0	0	0	0	0	0	0	1
29	O2-site	zein metabolism regulation	GATGATGTGG	0	1	1	2	2	1	0	0	1	1	1	0	0	0	2	0	0	0	0	1	0	0	0	0	0	1	0	1	0
30	circadian	circadian control	CAAAGATATC	0	0	0	1	2	1	0	0	0	0	0	1	1	2	0	0	1	0	0	0	1	0	0	0	1	0	0	0	0
31	Box 4	part of a conserved DNA module involved in light responsiveness	ATTAAT	1	2	4	4	3	1	0	0	3	2	3	0	1	3	2	3	1	2	1	2	2	0	0	4	2	1	0	1	0
32	TCCC-motif	part of a light responsive element	TCTCCCT	0	0	1	0	0	0	0	0	3	4	0	4	3	2	2	3	3	0	0	0	0	3	3	0	0	2	6	2	1
33	GT1-motif	light responsive element	GGTTAA	2	0	7	1	0	1	2	2	2	2	7	0	0	0	1	0	2	1	2	0	1	3	2	1	1	0	0	2	2
34	Sp1	light responsive element	GGGCGG	2	3	0	0	0	0	2	2	1	1	0	2	0	1	2	0	1	5	2	3	1	0	0	0	1	2	0	1	3
35	GATA-motif	part of a light responsive element	GATAGGA	2	1	1	1	0	0	1	1	3	3	1	1	1	2	0	1	2	1	2	1	1	2	2	0	1	0	0	0	0
36	TCT-motif	part of a light responsive element	TCTTAC	2	0	1	0	2	2	0	0	0	2	0	1	1	1	1	0	1	1	2	1	1	1	1	0	0	1	5	1	2
37	I-box	part of a light responsive element	GATAAGGTG	0	0	0	0	0	0	2	2	1	0	0	1	0	1	1	0	0	1	0	0	0	2	2	0	0	0	1	0	0
38	MRE	MYB binding site involved in light responsiveness	AACCTAA	0	0	0	0	1	0	0	0	0	0	0	0	0	1	0	2	1	0	0	0	1	0	0	0	1	0	0	0	0
39	3-AF1 binding site	light responsive element	TAAGAGAGGAA	0	0	1	0	0	0	0	0	0	0	1	0	0	0	1	0	0	1	0	0	0	0	0	0	0	0	1	1	0
40	ATC-motif	part of a conserved DNA module involved in light responsiveness	AGTAATCT	0	0	0	1	0	0	0	0	0	0	0	0	0	1	0	0	0	0	0	0	2	0	0	0	2	0	0	0	0
41	LAMP-element	part of a light responsive element	CTTTATCA	0	0	0	0	0	0	0	0	0	0	0	0	0	0	0	0	0	0	1	0	0	2	2	0	0	0	0	0	0
42	AT1-motif	part of a light responsive module	AATTATTTTTTATT	0	0	0	0	0	2	0	0	0	0	0	0	0	1	0	0	0	0	0	0	1	0	0	0	1	0	0	0	0
43	ATCT-motif	part of a conserved DNA module involved in light responsiveness	AATCTAATCC	0	0	0	1	1	0	0	0	1	1	0	0	0	0	0	0	0	1	0	0	0	0	0	0	0	0	0	0	0
44	chs-CMA2a	part of a light responsive element	TCACTTGA	1	0	0	1	1	0	0	0	0	0	0	0	0	0	0	0	1	0	1	0	0	0	0	0	0	0	0	0	0
45	chs-CMA1a	part of a light responsive element	TTACTTAA	1	1	0	0	0	0	0	0	0	0	0	0	0	0	0	0	0	0	1	1	0	0	0	0	0	0	0	0	0
46	GA-motif	part of a light responsive element	ATAGATAA	0	0	0	1	0	0	0	0	0	0	0	0	0	0	1	0	0	0	0	0	0	0	0	0	0	0	0	0	0
47	GATT-motif	part of a light responsive element	CTCCTGATTGGA	0	0	0	0	0	0	0	0	0	0	0	0	0	0	0	0	0	0	0	0	0	1	1	0	0	0	0	0	0
48	Pc-CMA2b	part of a light responsive element	AGATAATACCCTTT	0	0	1	0	0	0	0	0	0	0	1	0	0	0	0	0	0	0	0	0	0	0	0	0	0	0	0	0	0
49	GTGGC-motif	part of a light responsive element	CATCGTGTGGC	0	0	0	0	0	0	0	0	0	0	0	0	0	0	0	0	0	0	0	0	0	0	0	0	0	0	1	0	0
50	L-box	part of a light responsive element	ATTCTCACCTACCA	0	0	0	0	0	0	0	0	0	0	0	0	1	0	0	0	0	0	0	0	0	0	0	0	0	0	0	0	0
51	Pc-CMA2c	part of a light responsive element	GCCCACGCA	0	0	0	0	0	0	0	0	0	0	0	0	1	0	0	0	0	0	0	0	0	0	0	0	0	0	0	0	0
52	CAAT-box	common cis-acting element in promoter and enhancer regions	CAA(A)T	0	22	29	22	28	23	24	24	29	0	0	0	24	28	18	29	33	30	25	23	23	35	34	10	19	12	10	12	38
53	TATA-box	core promoter element around -30 of transcription start	TATA	14	8	35	70	30	53	38	35	14	14	34	17	5	67	15	69	31	17	17	6	54	3	6	17	44	23	5	31	63
54	A-box	cis-acting regulatory element	CCGTCC	0	1	0	0	0	3	0	0	0	0	0	1	1	2	3	0	1	1	0	1	0	0	0	0	0	3	1	3	0
55	CCAAT-box	MYBHv1 binding site	CAACGG	0	1	0	0	1	0	2	2	0	0	0	0	1	2	0	0	0	0	0	1	1	1	1	2	1	0	2	0	1
56	Box II -like sequence	cis-acting regulatory element	TCCGTGTACCA	0	0	0	0	0	0	0	0	0	0	0	0	0	0	0	0	0	1	0	0	0	0	0	0	0	0	0	0	0
57	Box III	protein binding site	ATCATTTTCACT	0	0	0	0	0	0	0	0	0	0	0	1	0	0	0	0	0	0	0	0	0	0	0	0	0	0	0	0	0
58	MYB	MYB-like sequence	TAACCA	3	3	1	2	1	0	1	0	3	2	1	1	0	1	1	1	0	0	3	3	1	2	2	1	1	1	1	1	2
59	AT-rich element	binding site of AT-rich DNA binding protein	ATAGAAATCAA	2	0	0	0	0	0	0	0	0	0	0	0	0	0	0	0	0	0	2	0	0	0	0	0	0	0	0	0	1
60	5UTR Py-rich stretch	cis-acting element conferring high transcription levels	TTTCTCTCCTCTTTTTCCTC	0	0	0	0	0	0	0	0	0	0	0	0	0	0	1	0	0	0	0	0	0	0	0	0	0	0	0	0	0
61	MYB	Unkown	CAACCA	0	2	2	0	3	2	1	1	1	1	2	0	0	1	0	0	1	0	0	1	0	4	4	2	0	0	3	1	1
62	MYB	Unkown	TAACCA	6	6	2	4	2	0	2	0	6	4	2	2	0	2	2	2	0	0	6	6	1	4	4	2	2	2	2	2	4
63	MYB	Unkown	CAACAG	2	2	0	2	0	0	4	2	4	4	0	2	2	0	0	6	0	0	2	2	0	6	6	0	0	0	0	0	2
65	Myb	Unkown	TAACTG	0	1	1	1	0	1	0	1	1	1	1	0	0	0	0	0	2	1	0	1	2	1	1	0	2	0	1	0	1
67	MYC	Unkown	CATGTG	3	0	1	0	0	0	2	2	1	0	1	1	1	0	0	0	0	0	3	0	1	4	2	1	2	2	2	1	1
68	MYC	Unkown	CAATTG	0	0	0	0	1	0	1	1	1	1	0	0	0	1	0	0	0	0	0	0	0	1	2	0	0	0	0	0	1
69	MYC	Unkown	CATTTG	1	4	4	2	4	0	2	2	1	1	4	0	0	0	1	2	4	4	1	4	2	2	1	1	1	1	1	1	2
	Myc	Unkown	TCTCTTA	1	2	1	0	0	0	0	0	0	0	1	1	0	0	1	1	0	0	1	1	1	0	0	0	1	1	4	1	0
72	as-1	Unkown	TGACG	3	2	2	1	1	4	5	4	6	3	2	2	2	2	5	1	1	2	3	3	4	1	1	7	4	2	2	2	1
73	AT~TATA-box	Unkown	TATATA	0	0	4	6	1	7	3	2	1	1	4	1	0	13	4	19	3	0	0	0	6	0	0	0	4	7	0	11	17
75	AAGAA-motif	Unkown	GGTAAAGAAA	2	1	4	3	1	2	0	1	1	1	4	0	1	2	0	0	1	0	2	1	1	2	2	0	1	0	1	1	2
76	W box	Unkown	TTGACC	1	0	2	2	1	0	0	1	0	0	2	0	2	2	3	2	3	0	1	0	1	2	2	1	0	0	0	1	1
77	ABRE3a	Unkown	TACGTG	0	0	1	0	1	1	1	1	2	2	1	1	2	1	0	1	2	1	1	0	0	0	0	1	0	3	1	3	1
78	ABRE4	Unkown	CACGTA	0	0	1	0	1	1	1	1	2	2	1	1	2	1	0	1	2	1	1	0	0	0	0	1	0	3	1	3	1
80	CCGTCC motif	Unkown	CCGTCC	0	1	3	0	0	0	0	0	0	0	0	1	1	2	3	0	1	1	0	1	0	0	0	0	0	3	1	3	0
82	MYB recognition site	Unkown	CCGTTG	0	1	0	0	1	0	2	2	0	0	0	0	1	0	2	0	0	0	0	1	1	1	1	2	1	0	2	0	1
83	TCA	Unkown	TCATCTTCAT	0	1	0	0	0	0	0	0	0	0	0	1	0	0	0	1	2	1	0	1	0	0	0	0	0	1	1	1	0
84	box S	Unkown	AGCCACC	0	0	0	0	0	0	0	0	2	2	0	0	1	0	1	0	0	0	0	0	0	0	0	1	0	1	0	1	0
85	AP-1	Unkown	TGAGTTAG	1	0	0	0	0	0	0	0	0	0	0	0	0	0	0	0	0	0	1	0	0	1	0	0	0	0	0	0	0
86	CARE	Unkown	CAACTCAC	0	0	0	0	0	0	0	0	0	0	0	0	0	1	0	0	0	0	0	0	0	0	0	0	0	0	0	0	0
87	CTAG-motif	Unkown	ACTAGCAGAA	0	0	0	0	0	1	0	0	0	0	0	0	0	0	0	0	0	0	0	0	0	0	0	0	0	0	0	0	0
88	dOCT	Unkown	CACGGATC	0	0	0	0	0	1	0	0	0	0	0	0	0	0	0	0	0	0	0	0	0	0	0	0	0	0	0	0	0
89	E2Fb	Unkown	TTTGCCGC	0	0	0	0	0	0	0	0	0	0	0	0	0	0	1	0	0	0	0	0	1	0	0	0	1	0	0	0	0
90	GRA	Unkown	CACTGGCCGCCC	0	0	0	0	0	0	0	0	0	0	0	0	0	0	0	0	0	0	0	0	0	0	0	0	0	1	0	1	0
91	JERE	Unkown	AGACCGCC	0	0	0	0	0	0	0	0	0	0	0	0	0	0	1	0	0	0	0	0	0	0	0	1	0	0	0	0	0
92	ACTCATCCT sequence	Unkown	ACTCATCCT	0	0	0	0	0	0	0	0	0	0	0	0	0	0	0	0	0	1	0	0	0	0	0	0	0	0	0	0	0
93	re2f-1	Unkown	GCGGGAAA	0	0	0	0	1	0	0	0	0	0	0	0	0	0	0	0	0	0	0	0	0	0	0	0	0	0	0	0	0
94	Unnamed__1	Unkown	CGTGG	3	2	5	1	1	2	1	1	3	4	3	0	5	3	4	2	1	1	3	2	6	1	1	8	6	3	3	4	1
95	Unnamed__2	Unkown	CCCCGG	1	2	0	0	2	0	2	2	1	0	1	1	0	1	0	0	2	0	1	2	0	7	7	1	0	0	2	0	1
96	Unnamed__4	Unkown	CTCC	21	35	34	17	21	17	47	45	33	34	36	51	40	21	39	26	21	25	21	32	30	24	25	29	30	43	37	42	17
97	Unnamed__6	Unkown	TATAAATATCT	0	0	1	3	0	0	0	0	0	0	1	0	0	0	0	1	0	0	0	0	0	1	0	1	0	1	0	1	0
98	Unnamed__8	Unkown	TCCACGTAGA	0	0	1	0	0	0	0	0	0	0	0	0	0	0	0	1	0	0	0	0	1	1	1	0	1	1	0	1	0
102	Unnamed__16	Unkown	GCTGCCCGTC	1	0	0	0	0	0	0	0	1	1	0	0	0	0	0	0	0	0	1	0	0	0	0	0	0	0	0	0	0
