# Supplementary material for: Identification of the AKCDPK gene family and AkCDPK15 functional analysis under drought and salt stress
Source: PLoS One. 2025 Jun 11;20(6):e0325453. doi: 10.1371/journal.pone.0325453 (PMC12157117; doi:10.1371/journal.pone.0325453)
Supplement: S7 Table — (XLSX) [file pone.0325453.s007.xlsx]

## Sheet: Sheet1
Table S7 AkCDPK15 protein phosphorylation site peptide information
Annotated Sequence	Modifications
[K].TDLISPVVVSPTMRR.[G]	1xPhospho [S/T]
[K].QLAAAPAGHKTDLISPVVVSPTMRR.[G]	3xPhospho [S15(88.5); S20(88.5); T22(88.5)]
[R].RHPSSDRGSSISSDNSGHSTAVSR.[H]	1xPhospho [S/T]
[R].YGSTLKESEIR.[D]	1xPhospho [S3(99.7)]
[K].AMDTDSSGAITFDELK.[A]	1xPhospho [S7(96.2)]
[K].DDDSSLKAIDFGLSVFFKPGQIFTDVVGSPYYVAPEVLCK.[H]	2xPhospho [S/T/Y]
[R].IDYGEFVAMMQKGSSMGLGR.[R]	1xPhospho [S/Y]
[R].RYGSTLK.[E]	1xPhospho [S/T/Y]
